# 1 **A protocol for an intercomparison of biodiversity and ecosystem** 2 **services models using harmonized land-use and climate scenarios**

3  
4 HyeJin Kim<sup>1,2</sup>, Isabel M.D. Rosa<sup>1,2</sup>, Rob Alkemade<sup>3,4</sup>, Paul Leadley<sup>5</sup>, George Hurtt<sup>6</sup>, Alexander Popp<sup>7</sup>, Detlef P van  
5 Vuuren<sup>8</sup>, Peter Anthoni<sup>9</sup>, Almut Arneth<sup>9</sup>, Daniele Baisero<sup>10</sup>, Emma Caton<sup>11</sup>, Rebecca Chaplin-Kramer<sup>12</sup>, Louise  
6 Chini<sup>6</sup>, Adriana De Palma<sup>11</sup>, Fulvio Di Fulvio<sup>13</sup>, Moreno Di Marco<sup>14</sup>, Felipe Espinoza<sup>11</sup>, Simon Ferrier<sup>15</sup>, Shinichiro  
7 Fujimori<sup>16</sup>, Ricardo E. Gonzalez<sup>17</sup>, Carlos Guerra<sup>1,2</sup>, Mike Harfoot<sup>18</sup>, Thomas D. Harwood<sup>15</sup>, Tomoko Hasegawa<sup>16</sup>,  
8 Vanessa Haverd<sup>19</sup>, Petr Havlík<sup>13</sup>, Stefanie Hellweg<sup>20</sup>, Samantha L. L. Hill<sup>11,18</sup>, Akiko Hirata<sup>21</sup>, Andrew J. Hoskins<sup>15</sup>,  
9 Jan H. Janse<sup>3,22</sup>, Walter Jetz<sup>23</sup>, Justin A. Johnson<sup>24</sup>, Andreas Krause<sup>9</sup>, David Leclère<sup>13</sup>, Ines S. Martins<sup>1,2</sup>, Tetsuya  
10 Matsui<sup>21</sup>, Cory Merow<sup>23</sup>, Michael Obersteiner<sup>13</sup>, Haruka Ohashi<sup>21</sup>, Benjamin Poulter<sup>25</sup>, Andy Purvis<sup>11,26</sup>, Benjamin  
11 Quesada<sup>9</sup>, Carlo Rondinini<sup>10</sup>, Aafke Schipper<sup>3,27</sup>, Richard Sharp<sup>12</sup>, Kiyoshi Takahashi<sup>21</sup>, Wilfried Thuiller<sup>28</sup>, Nicolas  
12 Titeux<sup>1,29</sup>, Piero Visconti<sup>30,31</sup>, Christopher Ware<sup>15</sup>, Florian Wolf<sup>1,2</sup>, Henrique M. Pereira<sup>1,2,32</sup>

13  
14 <sup>1</sup>German Centre for Integrative Biodiversity Research (iDiv) Halle-Jena- Leipzig, Deutscher Platz 5e, 04103 Leipzig,  
15 Germany

16 <sup>2</sup>Institute of Biology, Martin Luther University Halle Wittenberg, Am Kirchtor 1, 06108 Halle (Saale), Germany

17 <sup>3</sup>PBL Netherlands Environmental Assessment Agency, the Hague, the Netherlands

18 <sup>4</sup>Environmental System Analysis Group, Wageningen University, the Netherlands

19 <sup>5</sup>Ecologie Systématique Evolution, Univ. Paris-Sud, CNRS, AgroParisTech, Université Paris-Saclay, 91400, Orsay, France

20 <sup>6</sup>Department of Geographical Sciences, University of Maryland, College Park, MD 20740, USA

21 <sup>7</sup>Potsdam Institute for Climate Impact Research (PIK), Member of the Leibniz Association, Potsdam, Germany

22 <sup>8</sup>Copernicus Institute for Sustainable Development, Utrecht University, Utrecht, the Netherlands

23 <sup>9</sup>Karlsruhe Institute of Technology, Dept. Meteorology and Climate/Atmospheric Environmental Research,  
24 Kreuzeckbahnstr. 19, 82467 Garmisch-Partenkirchen, Germany

25 <sup>10</sup>C/O Global Mammal Assessment program, Department of Biology and Biotechnologies, Sapienza Università di Roma,  
26 Viale dell'Università 32, I-00185, Rome, Italy

27 <sup>11</sup>Department of Life Sciences, Natural History Museum, London SW7 5BD, U.K.

28 <sup>12</sup>The Natural Capital Project, Stanford University, 371 Serra Mall, Stanford, CA 94305, USA

29 <sup>13</sup>International Institute for Applied Systems Analysis, Schlossplatz 1, Laxenburg 2361, Austria

30 <sup>14</sup>CSIRO Land and Water, GPO Box 2583, Brisbane QLD 4001, Australia

31 <sup>15</sup>CSIRO Land and Water, GPO Box 1700, Canberra ACT 2601, Australia

32 <sup>16</sup>Center for Social and Environmental Systems Research, National Institute for Environmental Studies (NIES), 16-2  
33 Onogawa, Tsukuba, Ibaraki 305-8506, Japan

34 <sup>17</sup>Department of Life Sciences, Imperial College London, Silwood Park, Ascot SL5 7PY, U.K.

35 <sup>18</sup>UN Environment, World Conservation Monitoring Centre, 219 Huntingdon Road, Cambridge, CB3 0DL, UK.

36 <sup>19</sup>CSIRO Oceans and Atmosphere, Canberra, 2601, Australia

37 <sup>20</sup>Institute of Environmental Engineering, ETH Zurich, 8093 Zurich, Switzerland

38 <sup>21</sup>Forestry and Forest Products Research Institute, Forest Research and Management Organization, 1 Matsunosato, Tsukuba,  
39 Ibaraki, 305-8687, Japan

40 <sup>22</sup>Netherlands Inst. of Ecology NIOO-KNAW, Wageningen, the Netherlands

41 <sup>23</sup>Ecology and Evolutionary Biology, Yale University, 165 Prospect St, New Haven, CT 06511, USA

42 <sup>24</sup>Institute on the Environment, University of Minnesota, 1954 Buford Ave. St. Paul, MN 55105, USA

43 <sup>25</sup>NASA GSFC, Biospheric Science Lab., Greenbelt, MD 20771, USA

44 <sup>26</sup>Department of Life Sciences, Imperial College London, Silwood Park, Ascot SL5 7PY, U.K.

45 <sup>27</sup>Institute for Water and Wetland Research, PO Box 9010, 6500 GL Nijmegen, the Netherlands

46 <sup>28</sup>Univ. Grenoble Alpes, Univ. Savoie Mont-Blanc, CNRS, LECA, Grenoble, France

47 <sup>29</sup>Helmholtz Centre for Environmental Research - UFZ, Department of Community Ecology, Theodor-Lieser-Strasse 4, D-  
48 06210 Halle, Germany.

49 <sup>30</sup>Institute of Zoology, Zoological Society of London, Regent's Park, London, NW1 4RY

50 <sup>31</sup>Centre for Biodiversity and Environment Research, University College London, Gower Street, London, C1E6BT

51 <sup>32</sup>CIBIO/InBIO, Centro de Investigação em Biodiversidade e Recursos Genéticos, Cátedra REFER-Biodiversidade,  
52 Universidade do Porto, Campus Agrário de Vairão, R. Padre Armando Quintas, 4485-661 Vairão, Portugal

53

54 *Correspondence to:* Henrique M. Pereira (hpereira@idiv.de)

55 **Abstract.** To support the assessments of the Intergovernmental Science-Policy Platform on Biodiversity and Ecosystem  
56 Services (IPBES), the IPBES Expert Group on Scenarios and Models is carrying out an intercomparison of biodiversity and  
57 ecosystem services models using harmonized scenarios (BES-SIM). The goals of BES-SIM are (1) to project the global impacts  
58 of land use and climate change on biodiversity and ecosystem services (i.e. nature contributions to people) over the coming  
59 decades, compared to the 20<sup>th</sup> century, using a set of common metrics at multiple scales, and (2) to identify model uncertainties  
60 and research gaps through the comparisons of projected biodiversity and ecosystem services across models. BES-SIM uses  
61 three scenarios combining specific Shared Socio-economic Pathways (SSPs) and Representative Concentration Pathways  
62 (RCPs) to explore a wide range of land-use change and climate change futures. This paper describes the rationale for scenarios  
63 selection, the process of harmonizing input data for land use, based on the second phase of the Land Use Harmonization Project  
64 (LUH2), and climate, the biodiversity and ecosystem service models used, the core simulations carried out, the harmonization  
65 of the model output metrics, and the treatment of uncertainty. The results of this collaborative modelling project will support  
66 the ongoing global assessment of IPBES, strengthen ties between IPBES and the Intergovernmental Panel on Climate Change  
67 (IPCC) scenarios and modelling processes, advise the Convention on Biological Diversity on its development of a post-2020  
68 strategic plans and conservation goals, and inform the development of a new generation of nature-centred scenarios.

## 69 **1 Introduction**

70 Understanding how anthropogenic activities impact biodiversity, ecosystems, and their interactions with human societies is  
71 essential for nature conservation and sustainable development. Land use and climate change are widely recognized as two of  
72 the main drivers of future biodiversity change (Hirsch and Secretariat of the Convention on Biological Diversity, 2010;  
73 Maxwell et al., 2016; Sala, 2000; Secretariat of the Convention on Biological Diversity and United Nations Environment  
74 Programme, 2014) with potentially severe impacts on ecosystem services and ultimately human well-being (Cardinale et al.,  
75 2012; Millennium Ecosystem Assessment (Program), 2005). Habitat and land-use changes, resulting from past, present and  
76 future human activities, have immediate impacts on biodiversity and ecosystem services whereas the impacts of climate change  
77 have considerable lag times (Lehsten et al., 2015). Therefore, current and future land-use projections are essential elements  
78 for assessing biodiversity and ecosystem change (Titeux et al., 2016, 2017). Climate change has already observed direct and  
79 indirect impacts on biodiversity and ecosystems and it is projected to intensify as we approach the end of the century with

80 potentially severe consequences on species and habitats, thereby also on ecosystem functions and ecosystem services at high  
81 levels of climate change (Pecl et al., 2017; Settele et al., 2015).

82 Global environmental assessments, such as the Millennium Ecosystem Assessment (MA 2005), the Global Biodiversity  
83 Outlooks (GBO), the multiple iterations of the Global Environmental Outlook (GEO), the Intergovernmental Panel on Climate  
84 Change (IPCC), and other studies have used scenarios to assess the impact of socio-economic development pathways on land  
85 use and climate and their consequences for biodiversity and ecosystem services (Jantz et al., 2015; Pereira et al., 2010). Models  
86 are used in quantifying the narratives of scenarios using selected and modellable drivers, which describe key components of a  
87 system or relationships between them (Ferrier et al. 2016). So far, these scenarios analysis exercises have been based on a  
88 single model or a small number of models, and cross-model harmonization and uncertainty analysis have been limited. The  
89 Expert Group on Scenarios and Models of the Intergovernmental Science-Policy Platform on Biodiversity and Ecosystem  
90 Services (IPBES) is addressing this issue by carrying out a biodiversity and ecosystem services model intercomparison with  
91 harmonized scenarios.

92 Over the last two decades, IPCC has fostered the development of global scenarios to inform climate mitigation and  
93 adaptation policies. The Representative Concentration Pathways (RCPs) describe different climate futures based on  
94 greenhouse gas emissions over the 21<sup>st</sup> century (van Vuuren et al., 2011). These emissions pathways have been converted into  
95 climate projections in the most recent Climate Model Inter-comparison Project (CMIP5). In parallel, the climate research  
96 community also developed the Shared Socio-economic Pathways (SSPs) which consist of trajectories of future human  
97 development with different socio-economic conditions and associated land-use projections (Popp et al., 2017; Riahi et al.,  
98 2017). The SSPs can be combined with RCP-based climate projections to explore a range of futures for climate change and  
99 land-use change and are being used in a wide range of impact modelling intercomparisons (Rosenzweig et al., 2017; van  
100 Vuuren et al., 2014). Therefore, the use of the SSP-RCP framework for modelling the impacts on biodiversity and ecosystem  
101 services provides an outstanding opportunity to build bridges between the climate, biodiversity and ecosystem services  
102 communities, and has been explicitly recommended as a research priority in the IPBES assessment on scenarios and models  
103 (Ferrier et al. 2016).

104 Model intercomparisons bring together different communities of practice for comparable and complementary modelling,  
105 in order to improve the robustness and comprehensiveness of the subject modelled, and to estimate associated uncertainties  
106 (Warszawski et al., 2014). In the last decades, various model intercomparison projects (MIPs) have been initiated to assess the  
107 magnitude and uncertainty of climate change impacts. For instance, the Inter-Sectoral Impact Model Intercomparison Project  
108 (ISI-MIP) was initiated in 2012 to quantify and synthesize climate change impacts across sectors and scales (Frieler et al.,  
109 2015; Rosenzweig et al., 2017). The ISI-MIP aims to bridge sectors such as agriculture, forestry, fisheries, water, energy, and  
110 health with Global Circulation Models (GCMs), Earth System Models (ESMs), and Integrated Assessment Models (IAMs) for  
111 more integrated and impact-driven modelling and assessment (Frieler et al., 2017).

112 Here, we present the methodology used to carry out a Biodiversity and Ecosystem Services Scenario-based  
113 Intercomparison of Models (BES-SIM) in terrestrial and freshwater ecosystems. The BES-SIM project addresses the following

114 questions: (1) What are the projected magnitudes and spatial distribution of biodiversity and ecosystem services under a range  
115 of climate and land-use future scenarios? (2) What is the magnitude of the uncertainties associated with the projections obtained  
116 from different models and scenarios? We brought together ten biodiversity models and six ecosystem functions and ecosystem  
117 services models to assess impacts of land-use change and climate scenarios in coming decades (up to 2070) and to hindcast  
118 changes to the last century (to 1900). The modelling approaches differ in several ways in how they treat biodiversity and  
119 ecosystem services responses to land use and climate changes, including the use of correlative, deductive, and process-based  
120 approaches, and in how they treat spatial scale and temporal dynamics. We assess different dimensions of biodiversity  
121 including species richness, species abundance, community composition, and habitat shifts, as well as a range of measures on  
122 ecosystem services such as food production, pollination, water quantity and quality, climate regulation, soil protection, and  
123 pest control. This paper provides an overview of the scenarios, models and metrics used in this intercomparison, thus a roadmap  
124 for further analyses that is envisaged to be integrated into the first global assessment of the IPBES (Figure 1).

## 125 **2 Scenarios selection**

126 All the models involved in BES-SIM used the same set of scenarios using particular combinations of SSPs and RCPs. In the  
127 selection of the scenarios, we used the following criteria: 1) data on projections should be readily available, and 2) the total set  
128 should cover a broad range of land-use change and climate change projections. The first criterion implied that we selected  
129 SSP-RCP combinations included in the ScenarioMIP protocol as part of CMIP6 (O'Neill et al., 2016), as harmonised data was  
130 available for these runs and these from the basis of the CMIP climate simulations. The second criteria implied a selection  
131 within the ScenarioMIP set of scenarios with a low and high degree of climate change and different land-use scenarios. The  
132 final selection was SSP1 with RCP2.6 (moderate land-use pressure and low level of climate change) (van Vuuren et al., 2017),  
133 SSP3 with RCP6.0 (high land-use pressure and moderately high level of climate change) (Fujimori et al., 2017), and SSP5  
134 with RCP8.5 (medium land-use pressure and very high level of climate change) (Kriegler et al., 2017), thus allowing us to  
135 assess a broad range of plausible futures (Table 1). Further, by combining projections of low and high anthropogenic pressure  
136 of land-use with low and high level of climate change projections, we can test these drivers' individual and synergistic impacts  
137 on biodiversity and ecosystem services.

138 The first scenario (SSP1xRCP2.6) is characterized by relatively “environmentally-friendly world” with a low population  
139 growth, a relatively low demand for animal products, a high urbanization rate and a high agricultural productivity. These  
140 factors together lead to a decrease in land use of around 700 Mha globally over time (mostly pastures). This scenario is also  
141 characterised by low air pollution, while policies are introduced to limit the increase of greenhouse gases in the atmosphere,  
142 leading to an additional forcing of 2.6 W/m<sup>2</sup> before 2100. The second scenario (SSP3xRCP6.0) is characterised by “regional  
143 rivalry”, leading high population growth, slow economic development, material-intensive consumption and low food demand  
144 per capita. Agricultural land intensification is low, especially due to very limited transfer of new agricultural technologies to  
145 developing countries. This scenario has land-use change hardly regulated, with large conversion of land to human-dominated

146 uses, and has a relatively high level of climate change with radiative forcing of 6.0 W/m<sup>2</sup> by 2100. The third scenario  
147 (SSP5xRCP8.5) is a world characterised by “strong economic growth” fuelled by fossil fuels, with low population growth, a  
148 high food demand per capita, a high urbanization rate but also a high agricultural productivity. As a result, the scenario leads  
149 to a modest increase in land use. Air pollution policies are stringent, motivated by local health concerns. This scenario leads  
150 to a very high level of climate change with a radiative forcing of 8.5 W/m<sup>2</sup> by 2100. Full descriptions of each SSP scenario are  
151 given in Popp et al. (2017) and Riahi et al. (2017).

### 152 **3 Input data**

153 A consistent set of land use and climate data was used across the models to the extent possible, using existing datasets. All  
154 models in BES-SIM used the newly released Land Use Harmonization dataset version 2 (LUH2, Hurtt et al., 2018). For the  
155 models that used climate data, we selected the climate projections of the past, present and future from CMIP5 / ISI-MIP2a  
156 (McSweeney and Jones, 2016) and its downscaled version from the WorldClim (Fick and Hijmans, 2017) , as well as MAGICC  
157 6.0 (Meinshausen et al., 2011b, 2011a) from the Integrated Model to Assess the Global Environment (IMAGE) for GLOBIO  
158 models (Table 2). A complete list of input datasets and variables used by the models is documented in Table S1 of the  
159 Supplementary Materials.

#### 160 **3.1 Land cover and land-use change data**

161 The land-use scenarios provide an assessment of land-use dynamics in response to a range of socio-economic drivers and their  
162 consequences for the land system. The IAMs used to model land-use scenarios – Integrated Model to Assess the Global  
163 Environment (IMAGE) for SSP1/RCP2.5, Asia-pacific Integrated Model (AIM) for SSP3/RCP7.0, and REMIND/The Model  
164 of Agricultural Production and its Impact on the Environment (REMIND/MAGPIE) for SSP5/RCP8.0 – include different  
165 economic and land-use modules for the translation of narratives into consistent quantitative projections across scenarios (Popp  
166 et al., 2017). It is important to note that the land-use scenarios used, although driven mostly by the SSP storylines, were  
167 projected to be consistent with the paired RCPs and include biofuel deployment to mitigate climate change. As there was no  
168 land-use projection for SSP3 with RCP6.0, we chose the available closest simulation SSP3/RCP7.0

169 The land-use projections from each of the IAMs was harmonized using the LUH2 methodology. LUH2 was developed  
170 for CMIP6 and provides a global gridded land-use dataset comprising estimates of historical land-use change (850-2015) and  
171 future projections (2015-2100), obtained by integrating and harmonizing land-use history with future projections of different  
172 IAMs (Jungclaus et al., 2017; Lawrence et al., 2016; O’Neill et al., 2016). Compared to the first version of the LUH (Hurtt et  
173 al., 2011), LUH2 (Hurtt et al., 2018) is driven by the latest SSPs, has a higher spatial resolution (0.25 vs 0.50 degree) and more  
174 detailed land-use transitions (12 versus 5 possible land-use states), and increased data-driven constraints (Heinimann et al.,  
175 2017; Monfreda et al., 2008). LUH2 provides over 100 possible transitions per grid cell per year (e.g., crop rotations, shifting  
176 cultivation, agricultural changes, wood harvest) and various agricultural management layers (e.g., irrigation, synthetic nitrogen

177 fertilizer, biofuel crops), all with annual time steps. The 12 states of land include the separation of primary and secondary  
178 natural vegetation into forest and non-forest sub-types, pasture into managed pasture and rangeland, and cropland into multiple  
179 crop functional types (C3 annual, C3 perennial, C4 annual, C4 perennial, and N fixing crops) (Table 3).

180 For biodiversity and ecosystem services models that rely on discrete, high-resolution land-use data (i.e., the GLOBIO  
181 model for terrestrial biodiversity and the InVEST model), the fractional LUH2 data were downscaled to discrete land-use grids  
182 (10 arc-seconds resolution; ~300 m) with the land-use allocation routine of the GLOBIO4 model. To that end, the areas of  
183 urban, cropland, pasture, rangeland and forestry from LUH2 were first aggregated across the LUH2 grid cells to the regional  
184 level of the IMAGE model, with forestry consisting of the wood harvest from forested cells and non-forested cells with primary  
185 vegetation. Next, the totals per region were allocated to 300m cells with the GLOBIO4 land allocation routine, with specific  
186 suitability layers for urban, cropland, pasture, rangeland, and forestry. After allocation, cropland was reclassified into three  
187 intensity classes (low, medium, high) based on the amount of fertilizer per grid cell. More details on the downscaling procedure  
188 are provided in Appendix 1 of the Supplement Material.

### 189 **3.2 Climate data**

190 General Circulation Models (GCMs) are based on fundamental physical processes (e.g., conservation of energy, mass, and  
191 momentum and their interaction with the climate system) and simulate climate patterns of temperature, precipitation and  
192 extreme events at a large scale (Frischknecht et al., 2016). Some GCMs now incorporate elements of Earth's climate system  
193 (e.g. atmospheric chemistry, soil and vegetation, land and sea ice, carbon cycle) in ESMs (GCM with interactive carbon cycle),  
194 and have dynamically downscaled models with higher resolution data in Regional Climate Models (RCMs).

195 A large number of climate datasets are available today from multiple GCMs, but not all GCMs provide projections for  
196 all RCPs. Moreover, some models in BES-SIM required continuous time data. In order to harmonize the climate data to be  
197 used across biodiversity and ecosystem service models, we chose the bias-corrected climate projections from CMIP5, which  
198 were also adopted by ISIMIP2a (Hempel et al., 2013) or their downscaled versions available from WorldClim (Fick and  
199 Hijmans, 2017). Most analysis were carried out using a single GCM, the IPSL-CM5A-LR (Dufresne et al., 2013) to avoid a  
200 random selection of GCMs by the different teams (Table 2).

201 The ISI-MIP fast-track output from the IPSL model provides 12 climate variables on daily time steps from pre-industrial  
202 period 1951 to 2099 at 0.5-degree resolution (McSweeney and Jones, 2016). The WorldClim downscaled dataset has 19  
203 bioclimatic variables derived from monthly temperature and rainfall for 1960-1990 with multi-year averages for specific points  
204 in time (e.g., 2050, 2070) up to 2070. Six models in BES-SIM used ISI-MIP2a dataset and three models used WorldClim. An  
205 exception was made to the GLOBIO models, which used MAGICC 6.0 climate data (Meinshausen et al., 2011b, 2011a) in the  
206 IMAGE model framework (Stehfest et al., 2014), to which GLOBIO is tightly connected (Table 2). The variables used from  
207 climate dataset in each model are listed in Table S1.

### 208 **3.3 Other input data**

209 In addition to the land-use and climate data, most models use additional input data to run their future and past simulations to  
210 estimate changes in biodiversity and ecosystem services. For instance, species occurrence data are an integral part of modelling  
211 in several of the biodiversity models (i.e. AIM-biodiversity, MOL, cSAR-iDiv, cSAR-IIASA-ETH, BILBI, InSiGHTS) while  
212 some models (i.e. cSAR-iDiv, BILBI) rely on estimates of habitat affinity coefficients (e.g. reductions in species richness in a  
213 modified habitat relative to the pristine habitat) from the PREDICTS. In DGVM models (i.e. LPJ-GUESS, LPJ, CABLE),  
214 atmospheric CO<sub>2</sub> concentrations, irrigated fraction and wood harvest estimates are commonly used, while GLOBIO and  
215 GLOSP ecosystem services models rely on topography and soil type data for soil erosion measures. A full list of model-specific  
216 input data is listed in Table S1.

### 217 **4 Models in BES-SIM**

218 Biodiversity and ecosystem services models at the global scale have increased in number and improved considerably over the  
219 last decade, especially with advancement in biodiversity data availability and statistical modelling tools and methods (IPBES,  
220 2016). In order for a model to be included in BES-SIM, it had either to be published in a peer-reviewed journal, or adopt  
221 published methodologies, with modifications made to modelling sufficiently documented and accessible for review (Table S2).  
222 Sixteen models participated in BES-SIM (Table 4, details on modelling methods can be found in Table S2). These models  
223 were mainly grouped into four classes: species-based, community-based, and ecosystem-based models of biodiversity, and  
224 models of ecosystem functions and services. The methodological approaches, the taxonomic or functional groups, the spatial  
225 resolution and the output metrics differ across models (Table 4). 16 models are spatially explicit and use land-use data as an  
226 input, with 12 of them also using climate data. We also used one model (BIOMOD2) to assess uncertainty of climate range  
227 projections that does not use land-use data.

#### 228 **4.1 Species-based models of biodiversity**

229 Species-based models aim to predict historical, current, and future potential distribution and abundance of individual species.  
230 These can be developed using correlative methods based on species observation and environmental data (Aguirre-Gutiérrez et  
231 al., 2013; Guisan and Thuiller, 2005; Guisan and Zimmermann, 2000), as well as expert based solutions where data limitations  
232 exist (Rondinini et al., 2011). Depending on the methodologies employed and the ecological aspects modelled, they can be  
233 known as species distribution models, ecological niche models, bioclimatic envelop models and habitat suitability models  
234 (Elith and Leathwick, 2009), and they have been used to forecast environmental impacts on species distribution and status.

235 In BES-SIM, four species-based models were included: AIM-biodiversity, InSiGHTS, MOL and BIOMOD2 (Table 4,  
236 Table S2). The first three models project individual species distributions across a large number of species by combining  
237 projections of climate impacts on species ranges with projections of land-use impacts on species ranges. AIM (Ohashi et al.,  
238 in prep.) uses Global Biodiversity Information Facility (GBIF) occurrence data to train statistical models for current land use

239 and climate and uses these models to project future species distributions. InSiGHTS (Rondinini et al., 2011; Visconti et al.,  
240 2016) and MOL (Jetz et al., 2007; Merow et al., 2013) both rely on expert-based range maps as a baseline. INSIGHTS and  
241 MOL used an hierarchical approach with two steps: first, a statistical model trained on current species ranges is used to assess  
242 future climate suitability within species ranges; second, an expert-based model detailing associations between species and  
243 habitat types is used to assess the impacts of land-use in the climate suitable portion of the species range. BIOMOD2 (Thuiller,  
244 2004; Thuiller et al., 2009) was used to assess uncertainties in climate-envelope-based projections and was not include in the  
245 comparisons with other models of the impacts of land-use change (see section 7. Uncertainties).

## 246 **4.2 Community-based models of biodiversity**

247 Community-based models predict the assemblage of species using environmental data and assess changes in community  
248 composition through species presence and abundance (D'Amen et al., 2017). Output variables of community-based models  
249 include assemblage-level metrics such as the proportion of species persisting in a landscape, mean species abundances, and  
250 compositional similarity relative to a baseline (typically corresponding to a pristine landscape). Three models in BES-SIM  
251 (cSAR-iDiv, cSAR-IIASA-ETH, BILBI) rely on versions of the species-area relationship (SAR) to estimate the proportion of  
252 species persisting in human-modified habitats relative to native habitat, while three models (PREDICTS, GLOBIO Aquatic,  
253 GLOBIO Terrestrial) estimate a range of assemblage-level metrics based on correlative relationships between biodiversity  
254 responses and pressure variables (Table 4).

255 Both the cSAR-iDiv (Martins and Pereira, 2017) and the cSAR-IIASA-ETH (Chaudhary et al., 2015) models are based  
256 on the countryside species-area relationship, which uses habitat affinities to weight the areas of the different habitats in a  
257 landscape. The habitat affinities are calibrated from field studies by calculating the change in species richness in a modified  
258 habitat relative to the native habitat. The habitat affinities of the cSAR-iDiv model are estimated from the PREDICTS dataset  
259 (Hudson et al., 2014) while the habitat affinities of the cSAR-IIASA-ETH come from a previously published database of  
260 studies (Chaudhary et al., 2015). The cSAR-iDiv model considers two functional species groups (forest species and non-forest  
261 species) for one taxonomic group (birds) while the cSAR-IIASA-ETH uses a single functional group for multiple taxonomic  
262 groups (amphibians, birds, mammals, plants and reptiles).

263 BILBI (Hoskins et al., in prep.; Ferrier et al., 2004, 2007) couples application of the species-area relationship with  
264 correlative statistical modelling of continuous patterns of spatial turnover in the species composition of communities as a  
265 function of environmental variation. Through space-for-time projection of compositional turnover, this coupled model enables  
266 the effects of both climate change and habitat modification to be considered in estimating the proportion of species persisting  
267 (in this study for vascular plant species globally).

268 PREDICTS (Newbold et al., 2016; Purvis et al., 2018) uses a hierarchical mixed-effects framework to model how a range  
269 of site-level biodiversity metrics respond to land use and related pressures, using a global database of 767 studies, including  
270 over 32,000 sites and 51,000 species. GLOBIO (Alkemade et al., 2009; Janse et al., 2015; Schipper et al., 2016) is an integrative



271 modelling framework for aquatic and terrestrial biodiversity that builds upon correlative relationships between biodiversity  
272 intactness and pressure variables, established with meta-analyses of biodiversity monitoring data retrieved from the literature.

### 273 **4.3 Ecosystem-based model of biodiversity**

274 The Madingley model (Harfoot et al., 2014b) is a mechanistic individual-based model of ecosystem structure and function. It  
275 encodes a set of fundamental ecological principles to model how individual heterotrophic organisms with a body size greater  
276 than 10  $\mu\text{g}$  that feed on other living organisms interact with each other and with their environment. The model is general in  
277 the sense that it applies the same set of principles for any ecosystem to which it is applied, and is applicable across scales from  
278 local to global. To capture the ecology of all organisms, the model adopts a functional trait based approach with organisms  
279 characterised by a set of categorical traits (feeding mode, metabolic pathway, reproductive strategy and movement ability), as  
280 well as continuous traits (juvenile, adult and current body mass). Properties of ecological communities emerge from the  
281 interactions between organisms, influenced by their environment. The functional diversity of these ecological communities  
282 can be calculated as well as the dissimilarity over space or time between communities (Table S2).

### 283 **4.4 Models of ecosystem functions and services**

284 In order to measure ecosystem functions and services, three Dynamic Global Vegetation Models (DGVMs) (i.e., LPJ-GUESS,  
285 LPJ, CABLE) and three ecosystem services models (i.e., InVEST, GLOBIO, GLOSP) were engaged in this model  
286 intercomparison. The DGVMs are process-based models that simulate responses of potential natural vegetation and associated  
287 biogeochemical and hydrological cycles to changes in climate and atmospheric  $\text{CO}_2$  and disturbance regime (Prentice et al.,  
288 2007). Processes in anthropogenically managed land (crop, pasture and managed forests) are also increasingly being accounted  
289 for (Arneeth et al., 2017). DGVMs can project changes in future ecosystem state and functioning, and habitat structure, however,  
290 they are limited in capturing species-level biodiversity change because vegetation is represented by a small number of plant  
291 functional types (PFTs) (Bellard et al., 2012; Thuiller et al., 2013).

292 The InVEST (Sharp et al., 2014) suite includes 18 models that maps and measures the flow and value of ecosystem goods  
293 and services across a land or a seascape, based on biophysical processes of the structure and function of ecosystems, accounting  
294 for both supply and demand. The GLOBIO model (Alkemade et al., 2009, 2014; Schulp et al., 2012) estimates ecosystem  
295 services based on outputs from the IMAGE model (Stehfest et al., 2014), the global hydrological model PCRaster Global  
296 Water Balance (PCR-GLOBWB, van Beek et al., 2011), and the Global Nutrient Model (Beusen et al., 2015). It is based on  
297 correlative relationships between ecosystem functions and services and particular environmental variables (mainly land use),  
298 quantified based on literature data. Finally, the GLOSP (Guerra et al., 2016) is a 2D model that estimates the level of global  
299 and local soil erosion and protection using the Universal Soil Loss Equation.

## 300 **5 Output metrics**

301 Given the diversity of modelling approaches, a wide range of biodiversity and ecosystem services metrics can be produced by  
302 the model set (Table S2). For the biodiversity model intercomparison analysis, three main categories of common output metrics  
303 were used, across two scales – local ( $\alpha$ ) and global ( $\gamma$ ): number of species per unit area (N), proportion of species persisting  
304 (P); abundance-based intactness (I); and mean suitable habitat extent across species (H) (Table 6). The proportion of species  
305 persisting is the projected species richness relative to the initial species richness, calculated at the local scale (alpha:  $P\alpha$ ) or  
306 aggregated to IPBES subregional and global scales (gamma:  $P\gamma$ ). Intactness, which can be estimated in several ways, refers to  
307 the difference between the current community composition and the inferred original state in the native vegetation. This metric  
308 is available only at the local scale ( $I\alpha$ ) and for two community-based models (i.e., GLOBIO and PREDICTS). The habitat  
309 change (H) measures mean available habitat across species and can be reported locally ( $H\alpha$ ) and at the global scale ( $H\gamma$ ) for  
310 species-level models (i.e. AIM-biodiversity, InSiGHTS, MOL) (Table 6).

311 For ecosystem functions and services, each model's output metrics were mapped onto the new classification of Nature's  
312 Contributions to People (NCP) published by the IPBES scientific community (Díaz et al., 2018). Among the 18 possible NCPs,  
313 the combination of models participating in BES-SIM were able to provide measures for 10 NCPs, including regulating metrics  
314 on pollination (e.g., proportion of agricultural lands whose pollination needs are met), climate (e.g., vegetation carbon, total  
315 carbon uptake and loss), water quantity (e.g., monthly runoff), water quality (e.g., nitrogen and phosphorus leaching, algal  
316 blooms), soil protection (e.g., erosion risk), hazards (e.g., coastal resilience, flood risk) and detrimental organisms (e.g. fraction  
317 of cropland potentially protected by the natural pest, relative to all available cropland), and material metrics on bioenergy (e.g.  
318 bioenergy-crop production), food and feed (e.g. total crop production) and materials (e.g. wood harvest) (Table 6). Some of  
319 these metrics require careful interpretation in the context of NCPs (e.g., risk indices) and additional translation of increasing  
320 or declining measures of ecosystem functions and services (e.g., food and feed, water quantity) into contextually relevant  
321 information (i.e., positive or negative impacts) on human well-being and quality of life. Given disparity of metrics across  
322 models within each NCP category, names and units of the metrics are listed in Table 6 with definitions and methods provided  
323 in Table S3.

## 324 **6 Core simulations**

325 The initial simulations for BES-SIM required three sets of outputs from the modelling teams: future (2015-2050 and 2015-  
326 2070) and past (1900-2015) changes (Table 7). For the past, present and future analyses, models were run from 1900 (or the  
327 closest year possible if there were data limitations) through 2070 to better assess the impact of climate change in models where  
328 feasible. Outputs comprised the absolute and relative changes in metric values between modelling years (e.g., species richness  
329 (SR) in 2015 and 2050 for 2015-2050), as well as the absolute and percentage changes in this period (e.g., the absolute change  
330 in SR from 2015 to 2050, as well as the relative change calculated as  $(SR_{2050} - SR_{2015})/SR_{2015}$ ). Models that simulated a  
331 continuous time-series of climate change (and land-use change) impacts provided 20-year averages around these mid-points

332 to account for inter-annual variability. Furthermore, the results were reported in three spatial units: globally and by IPBES  
333 subregions (gamma metrics), and at a one-degree spatial resolution (alpha metrics). The models ran simulations at their original  
334 spatial resolutions, and subsequently aggregated the outputs to the three reporting scales (global, IPBES subregions and one-  
335 degree grid cells) to facilitate intercomparison, using the arithmetic mean of the percentage change calculated at the original  
336 resolution (Table 4).

337 To measure the individual and synergistic impacts of land use and climate change on biodiversity and ecosystem services,  
338 models accounting for both types of drivers in their structure were run three times using land-use change only, climate change  
339 only, and the combination of both. For instance, to measure the impact of land use alone, the projections into 2050 (or 2070)  
340 were obtained while retaining climate data constant from present (2015) to the future (2050 or 2070). Similarly, to measure  
341 the impact of climate change alone, the climate projections into 2050 (or 2070) were obtained while retaining the land-use data  
342 constant from present (2015) to the future (2050 or 2070). Finally, to measure the impact of land use and climate change  
343 combined, models were run using projections of both land use and climate change into 2050 (or 2070).

344 Models were allowed to use their own re-categorization of the land-use classes in LUH2 dataset (Table S1) and select a  
345 climate dataset (e.g., Worldclim) that best suited their needs. For the past projections, models used past data in LUH2 and  
346 climate datasets with model specific assumptions in setting targets to year 1900 on variables for which historical data do not  
347 exist (Tables S1, S2). For the models that used ISI-MIP 2a IPSL climate dataset, random years from 1951 to 1960 were selected  
348 to fill the gap in climate input for years 1901 to 1950. The models (i.e., InSiGHTS, BILBI) that used WorldClim dataset did  
349 not simulate climate scenarios for the past projections given the gap in climate input before 1960. An overview of the model  
350 modifications and assumptions made to historical projections, which are specific to this intercomparison experiment, is  
351 provided in Table S2.

## 352 **7 Uncertainties**

353 Reporting uncertainty is a critical component of model intercomparison exercises (IPBES 2016). Within BES-SIM,  
354 uncertainties were explored in two ways: (1) each individual model had to report their original metrics' mean values, and  
355 where possible the 25<sup>th</sup>, 50<sup>th</sup>, and 75<sup>th</sup> percentiles based on different model parameterizations; and when combining the data  
356 provided by the different models, the average and the standard deviation of the common metrics (i.e., intermodel average and  
357 standard deviation of  $P_y$ , for example) were calculated; (2) the BIOMOD model was used in assessing the uncertainty in  
358 changes in species ranges arising from using different RCP scenarios, different GCMs, a suite of algorithms (e.g., random  
359 forest, logistic regression) and different species dispersal hypotheses to estimate change in species ranges and diversity  
360 distributions (change in alpha and beta diversity).

361 In the intercomparison analysis, we will conduct a comprehensive uncertainty analysis based on a variance partitioning  
362 approach on the outputs provided by the models of biodiversity. This will allow us to highlight uncertainties arising from the  
363 land use (SSPs), the climate (RCPs and GCMs), and, where relevant, the different taxa.

## 364 **8 Discussion**

365 This manuscript lays out the context, motives, processes, and approaches taken for the first round of the Biodiversity and  
366 Ecosystem Services Model Intercomparison Project (BES-SIM v1.0). This model intercomparison initiative aims to provide  
367 scientifically rigorous information to the IPBES and its ongoing and future assessments, the CBD and its strategic plans and  
368 conservation goals, and other relevant stakeholders on the expected status and trends of biodiversity and ecosystem services  
369 using a suite of metrics from a range of global models. The resulting outputs will include the analyses on the past, present and  
370 future impacts of land-use change, climate change and other drivers as embodied in a range of human development scenarios,  
371 coupled with associated climate projections. The model intercomparison analyses will put the future in the context of the past  
372 and the present.

373 The existing SSP and RCP scenarios provided a consistent set of past and future projections of two major drivers of  
374 terrestrial and freshwater biodiversity loss and ecosystem change – land use and climate. However, we acknowledge that these  
375 projections have certain limitations. These include limited inclusion of biodiversity-specific policies in the storylines (only the  
376 SSP1 baseline emphasises additional biodiversity policies) (O'Neill et al., 2016; Rosa et al., 2017), coarse spatial resolution,  
377 and land-use classes that are not sufficiently detailed to fully capture the response of biodiversity to land-use change (Harfoot  
378 et al., 2014a; Titeux et al., 2016, 2017). The heterogeneity of models and their methodological approaches, as well as additional  
379 harmonization required in data processing and lack of comparable metrics in ecosystem functions and services (Tables 7, S3),  
380 are areas for future work. In the future, it will be also important to capture the uncertainties associated with input data, with a  
381 focus on uncertainty in land-use and climate projections resulting from differences among IAMs and GCMs on each SSP and  
382 RCP scenarios, as they present a wide range of results with model specific assumptions and parameterizations (Popp et al.,  
383 2017). The gaps identified through BES-SIM and future directions for research and modelling will be published with analyses  
384 of the results on the model intercomparison and on individual models.

385 With growing demands for inter-sectoral collaboration in reaching the United Nations Aichi Biodiversity Targets and  
386 Sustainable Development Goals by 2020 and 2030 respectively, and ongoing discussion on the development of new  
387 biodiversity strategic plan 2020-2050 of the Convention on Biological Diversity, the initiation of BES-SIM was timely. Using  
388 consistent sets of scenarios with other model intercomparison projects, such as ScenarioMIP and CMIP6, will increase the  
389 potential for future collaboration and harmonization for more interactive modelling of ecological and socio-economic systems.  
390 Through such an effort, BES-SIM envisages to make scenarios and modelling more relevant and usable for biodiversity  
391 conservation and sustainable development. Furthermore, the climate science community has managed to put climate change  
392 on the agenda as a global challenge as a result of providing decision-makers with scientifically credible information on climate  
393 change and its impact on environment and society (Zhao, 2017). We envision BES-SIM to have a similarly important role in  
394 raising the general public's awareness to the issue of biodiversity loss and ecosystem degradation, and ultimately, its impacts  
395 on human well-being.

396 As a long-term perspective, BES-SIM is expected to provide critical foundation and insights for the ongoing development  
397 of nature-centred, multiscale Nature Futures scenarios (Rosa et al., 2017). Catalysed by the IPBES, this new scenarios and  
398 modelling framework will shift traditional ways of forecasting impacts of society on nature to more integrative, biodiversity-  
399 centred visions and pathways. With positive outlooks on sustainable future, Nature Futures scenarios are envisaged to be  
400 applicable and achievable in conservation policies and practice by integrating socio-ecological feedback loops across drivers,  
401 biodiversity, ecosystems, ecosystem services, and human well-being and by incorporating multiple systems of knowledge  
402 (Rosa et al., 2017). In a next round of BES-SIM, we intend to use biodiversity-centred storylines, with associated land-use and  
403 climate projections, to project dynamics of biodiversity and ecosystem services. Further, we would expand the modelling  
404 communities involved to improve the socio-ecological link to human well-being. This will help researchers, policymakers and  
405 practitioners to collectively identify areas of concern to explore alternatives pathways for sustainable future and to integrate  
406 stronger conservation policies in scenarios development.  
407

## 408 **9. Code and data availability**

409 The protocol and supplementary materials for this model intercomparison will become downloadable from the BES-SIM  
410 website in the future. The LUH2 land-use data used for model runs are available on <http://luh.umd.edu/data.shtml>. The climate  
411 datasets used in BES-SIM can be downloaded from the respective websites (<https://www.isimip.org/outputdata/>,  
412 <http://worldclim.org/version1>)  
413

414 *Author contributions.* All authors co-designed the study under the coordination of Henrique M. Pereira, Rob Alkemade, Paul  
415 Leadley and Isabel M.D. Rosa. HyeJin Kim prepared the manuscript with contributions from all co-authors.  
416

417 *Competing interests:* The authors declare that they have no conflict of interest.  
418

419 *Acknowledgements*

420 HJK, ISM, FW, CG and HMP are supported by the German Centre for integrative Biodiversity Research (iDiv) Halle-Jena-  
421 Leipzig, funded by the German Research Foundation (FZT 118). IMDR received funding from the European Union's Horizon  
422 2020 research and innovation programme under the Marie Skłodowska-Curie grant agreement No 703862. PL was supported  
423 by the LabEx BASC supported by the French "Investment d'Avenir" program (grant ANR-11-LABX-0034). AA, AK, BQ  
424 and PA acknowledge support from the Helmholtz Association and its ATMO Programme. Support was also provided by the  
425 EU FP7 project LUC4C. AP, ADP and SLLH are supported by the Natural Environment Research Council U.K. (grant number  
426 NE/M014533/1) and by a DIF grant from the Natural History Museum. RCK and RS were supported by private gifts to the  
427 Natural Capital Project. GCH and LPC gratefully acknowledge the support of DOE-SciDAC program. David Leclère (DL),

428 Fulvio Di Fulvio (FDF), Petr Havlík (PH), Michael Obersteiner (MO) are supported by the project IS-WEL-Integrated  
429 Solutions for Water, Energy and Land funding from Global Environmental Facility, Washington, USA, coordinated by United  
430 Nations Industrial Development Organization (UNIDO), UNIDO Project No. 140312. FDF and MO are supported by the ERC  
431 SYNERGY grant project IMBALANCE-P-Managing Phosphorous limitation in a nitrogen-saturated Anthropocene, funding  
432 from European Commission, European Research Council Executive Agency, grant agreement No. 610028. DL and PH were  
433 supported by the project SIGMA- Stimulating Innovation for Global Monitoring of Agriculture and its Impact on the  
434 Environment in support of GEOGLAM, funding from the European Union’s FP7 research and innovation programme under  
435 the Environment area, grant agreement No. 603719. TH, HO, AH, SF, TM and KT are supported by the Global Environmental  
436 Research (S-14) of the Ministry of the Environment of Japan. TH, SF and KT are supported by Environment Research and  
437 Technology Development Fund 2-1702 of the Environmental Restoration and Conservation Agency of Japan and JSPS  
438 Overseas Research Fellowships. MH was supported by a KR Rasmussen Foundation grant “Modelling the Biodiversity  
439 Planetary Boundary and Embedding Results into Policy”. VH acknowledges support from the Earth Systems and Climate  
440 Change Hub, funded by the Australian Government’s National Environmental Science Program. CM acknowledges funding  
441 from NSF Grant DEB1565046. Finally, we also thank the following organizations for funding the workshops: PBL Netherland  
442 Environment Assessment Agency, UNESCO (March 2016), iDiv German Centre for integrative Biodiversity Research  
443 (October 2016, October 2017) and Zoological Society of London (January 2018).

#### 444 **References**

- 445 Aguirre-Gutiérrez, J., Carvalheiro, L. G., Polce, C., van Loon, E. E., Raes, N., Reemer, M. and Biesmeijer, J. C.: Fit-  
446 for-Purpose: Species Distribution Model Performance Depends on Evaluation Criteria – Dutch Hoverflies as a Case  
447 Study, edited by M. G. Chapman, PLoS ONE, 8(5), e63708, doi:10.1371/journal.pone.0063708, 2013.
- 448 Alkemade, R., van Oorschot, M., Miles, L., Nellemann, C., Bakkenes, M. and ten Brink, B.: GLOBIO3: A Framework  
449 to Investigate Options for Reducing Global Terrestrial Biodiversity Loss, *Ecosystems*, 12(3), 374–390,  
450 doi:10.1007/s10021-009-9229-5, 2009.
- 451 Alkemade, R., Burkhard, B., Crossman, N. D., Nedkov, S. and Petz, K.: Quantifying ecosystem services and indicators  
452 for science, policy and practice, *Ecol. Indic.*, 37, 161–162, doi:10.1016/j.ecolind.2013.11.014, 2014.
- 453 Arkema, K. K., Guannel, G., Verutes, G., Wood, S. A., Guerry, A., Ruckelshaus, M., Kareiva, P., Lacayo, M. and  
454 Silver, J. M.: Coastal habitats shield people and property from sea-level rise and storms, *Nat. Clim. Change*, 3(10),  
455 913–918, doi:10.1038/nclimate1944, 2013.
- 456 Arneth, A., Sitch, S., Pongratz, J., Stocker, B. D., Ciais, P., Poulter, B., Bayer, A. D., Bondeau, A., Calle, L., Chini, L.  
457 P., Gasser, T., Fader, M., Friedlingstein, P., Kato, E., Li, W., Lindeskog, M., Nabel, J. E. M. S., Pugh, T. A. M.,  
458 Robertson, E., Viovy, N., Yue, C. and Zaehle, S.: Historical carbon dioxide emissions caused by land-use changes are  
459 possibly larger than assumed, *Nat. Geosci.*, 10(2), 79–84, doi:10.1038/ngeo2882, 2017.
- 460 van Beek, L. P. H., Wada, Y. and Bierkens, M. F. P.: Global monthly water stress: 1. Water balance and water  
461 availability: GLOBAL MONTHLY WATER STRESS, 1, *Water Resour. Res.*, 47(7), doi:10.1029/2010WR009791,  
462 2011.

- 463 Bellard, C., Bertelsmeier, C., Leadley, P., Thuiller, W. and Courchamp, F.: Impacts of climate change on the future of  
464 biodiversity: Biodiversity and climate change, *Ecol. Lett.*, 15(4), 365–377, doi:10.1111/j.1461-0248.2011.01736.x,  
465 2012.
- 466 Beusen, A. H. W., Van Beek, L. P. H., Bouwman, A. F., Mogollón, J. M. and Middelburg, J. J.: Coupling global  
467 models for hydrology and nutrient loading to simulate nitrogen and phosphorus retention in surface water &ndash;  
468 description of IMAGE–GNM and analysis of performance, *Geosci. Model Dev.*, 8(12), 4045–4067, doi:10.5194/gmd-  
469 8-4045-2015, 2015.
- 470 Cardinale, B. J., Duffy, J. E., Gonzalez, A., Hooper, D. U., Perrings, C., Venail, P., Narwani, A., Mace, G. M., Tilman,  
471 D., Wardle, D. A., Kinzig, A. P., Daily, G. C., Loreau, M., Grace, J. B., Larigauderie, A., Srivastava, D. S. and Naeem,  
472 S.: Biodiversity loss and its impact on humanity, *Nature*, 486(7401), 59–67, doi:10.1038/nature11148, 2012.
- 473 Chaplin-Kramer, R., Dombeck, E., Gerber, J., Knuth, K. A., Mueller, N. D., Mueller, M., Ziv, G. and Klein, A.-M.:  
474 Global malnutrition overlaps with pollinator-dependent micronutrient production, *Proc. R. Soc. B Biol. Sci.*,  
475 281(1794), 20141799–20141799, doi:10.1098/rspb.2014.1799, 2014.
- 476 Chaudhary, A., Verones, F., de Baan, L. and Hellweg, S.: Quantifying Land Use Impacts on Biodiversity: Combining  
477 Species–Area Models and Vulnerability Indicators, *Environ. Sci. Technol.*, 49(16), 9987–9995,  
478 doi:10.1021/acs.est.5b02507, 2015.
- 479 D’Amen, M., Rahbek, C., Zimmermann, N. E. and Guisan, A.: Spatial predictions at the community level: from  
480 current approaches to future frameworks: Methods for community-level spatial predictions, *Biol. Rev.*, 92(1), 169–  
481 187, doi:10.1111/brv.12222, 2017.
- 482 Díaz, S., Pascual, U., Stenseke, M., Martín-López, B., Watson, R. T., Molnár, Z., Hill, R., Chan, K. M. A., Baste, I. A.,  
483 Brauman, K. A., Polasky, S., Church, A., Lonsdale, M., Larigauderie, A., Leadley, P. W., van Oudenhoven, A. P. E.,  
484 van der Plaats, F., Schröter, M., Lavorel, S., Aumeeruddy-Thomas, Y., Bukvareva, E., Davies, K., Demissew, S., Erpul,  
485 G., Failler, P., Guerra, C. A., Hewitt, C. L., Keune, H., Lindley, S. and Shirayama, Y.: Assessing nature’s contributions  
486 to people, *Science*, 359(6373), 270–272, doi:10.1126/science.aap8826, 2018.
- 487 Dufresne, J.-L., Foujols, M.-A., Denvil, S., Caubel, A., Marti, O., Aumont, O., Balkanski, Y., Bekki, S., Bellenger, H.,  
488 Benschila, R., Bony, S., Bopp, L., Braconnot, P., Brockmann, P., Cadule, P., Cheruy, F., Codron, F., Cozic, A., Cugnet,  
489 D., de Noblet, N., Duvel, J.-P., Ethé, C., Fairhead, L., Fichet, T., Flavoni, S., Friedlingstein, P., Grandpeix, J.-Y.,  
490 Guez, L., Guilyardi, E., Hauglustaine, D., Hourdin, F., Idelkadi, A., Ghattas, J., Joussaume, S., Kageyama, M.,  
491 Krinner, G., Labetoulle, S., Lahellec, A., Lefebvre, M.-P., Lefevre, F., Levy, C., Li, Z. X., Lloyd, J., Lott, F., Madec,  
492 G., Mancip, M., Marchand, M., Masson, S., Meurdesoif, Y., Mignot, J., Musat, I., Parouty, S., Polcher, J., Rio, C.,  
493 Schulz, M., Swingedouw, D., Szopa, S., Talandier, C., Terray, P., Viovy, N. and Vuichard, N.: Climate change  
494 projections using the IPSL-CM5 Earth System Model: from CMIP3 to CMIP5, *Clim. Dyn.*, 40(9–10), 2123–2165,  
495 doi:10.1007/s00382-012-1636-1, 2013.
- 496 Elith, J. and Leathwick, J. R.: Species Distribution Models: Ecological Explanation and Prediction Across Space and  
497 Time, *Annu. Rev. Ecol. Evol. Syst.*, 40(1), 677–697, doi:10.1146/annurev.ecolsys.110308.120159, 2009.
- 498 Ferrier, S., Powell, G. V. N., Richardson, K. S., Manion, G., Overton, J. M., Allnutt, T. F., Cameron, S. E., Mantle, K.,  
499 Burgess, N. D., Faith, D. P., Lamoreux, J. F., Kier, G., Hijmans, R. J., Funk, V. A., Cassis, G. A., Fisher, B. L.,  
500 Flemons, P., Lees, D., Lovett, J. C. and Van Rompaey, R. S. A. R.: Mapping More of Terrestrial Biodiversity for  
501 Global Conservation Assessment, *BioScience*, 54(12), 1101, doi:10.1641/0006-  
502 3568(2004)054[1101:MMOTBF]2.0.CO;2, 2004.
- 503 Ferrier, S., Manion, G., Elith, J. and Richardson, K.: Using generalized dissimilarity modelling to analyse and predict  
504 patterns of beta diversity in regional biodiversity assessment, *Divers. Distrib.*, 13(3), 252–264, doi:10.1111/j.1472-  
505 4642.2007.00341.x, 2007.

- 506 Fick, S. E. and Hijmans, R. J.: WorldClim 2: new 1-km spatial resolution climate surfaces for global land areas: NEW  
507 CLIMATE SURFACES FOR GLOBAL LAND AREAS, *Int. J. Climatol.*, 37(12), 4302–4315, doi:10.1002/joc.5086,  
508 2017.
- 509 Frieler, K., Levermann, A., Elliott, J., Heinke, J., Arneth, A., Bierkens, M. F. P., Ciais, P., Clark, D. B., Deryng, D.,  
510 Döll, P., Falloon, P., Fekete, B., Folberth, C., Friend, A. D., Gellhorn, C., Gosling, S. N., Haddeland, I., Khabarov, N.,  
511 Lomas, M., Masaki, Y., Nishina, K., Neumann, K., Oki, T., Pavlick, R., Ruane, A. C., Schmid, E., Schmitz, C., Stacke,  
512 T., Stehfest, E., Tang, Q., Wisser, D., Huber, V., Piontek, F., Warszawski, L., Schewe, J., Lotze-Campen, H. and  
513 Schellnhuber, H. J.: A framework for the cross-sectoral integration of multi-model impact projections: land use  
514 decisions under climate impacts uncertainties, *Earth Syst. Dyn.*, 6(2), 447–460, doi:10.5194/esd-6-447-2015, 2015.
- 515 Frieler, K., Lange, S., Piontek, F., Reyer, C. P. O., Schewe, J., Warszawski, L., Zhao, F., Chini, L., Denvil, S.,  
516 Emanuel, K., Geiger, T., Halladay, K., Hurtt, G., Mengel, M., Murakami, D., Ostberg, S., Popp, A., Riva, R.,  
517 Stevanovic, M., Suzuki, T., Volkholz, J., Burke, E., Ciais, P., Ebi, K., Eddy, T. D., Elliott, J., Galbraith, E., Gosling, S.  
518 N., Hattermann, F., Hickler, T., Hinkel, J., Hof, C., Huber, V., Jägermeyr, J., Krysanova, V., Marcé, R., Müller  
519 Schmied, H., Mouratiadou, I., Pierson, D., Tittensor, D. P., Vautard, R., van Vliet, M., Biber, M. F., Betts, R. A.,  
520 Bodirsky, B. L., Deryng, D., Frothingham, S., Jones, C. D., Lotze, H. K., Lotze-Campen, H., Sahajpal, R., Thonicke, K.,  
521 Tian, H. and Yamagata, Y.: Assessing the impacts of 1.5 °C global warming – simulation protocol of the Inter-Sectoral  
522 Impact Model Intercomparison Project (ISIMIP2b), *Geosci. Model Dev.*, 10(12), 4321–4345, doi:10.5194/gmd-10-  
523 4321-2017, 2017.
- 524 Frischknecht, R., Fantke, P., Tschümperlin, L., Niero, M., Antón, A., Bare, J., Boulay, A.-M., Cherubini, F.,  
525 Hauschild, M. Z., Henderson, A., Lasseur, A., McKone, T. E., Michelsen, O., i Canals, L. M., Pfister, S., Ridoutt,  
526 B., Rosenbaum, R. K., Verones, F., Vigon, B. and Jolliet, O.: Global guidance on environmental life cycle impact  
527 assessment indicators: progress and case study, *Int. J. Life Cycle Assess.*, 21(3), 429–442, doi:10.1007/s11367-015-  
528 1025-1, 2016.
- 529 Fujimori, S., Hasegawa, T., Masui, T., Takahashi, K., Herran, D. S., Dai, H., Hijioka, Y. and Kainuma, M.: SSP3:  
530 AIM implementation of Shared Socioeconomic Pathways, *Glob. Environ. Change*, 42, 268–283,  
531 doi:10.1016/j.gloenvcha.2016.06.009, 2017.
- 532 Guannel, G., Arkema, K., Ruggiero, P. and Verutes, G.: The Power of Three: Coral Reefs, Seagrasses and Mangroves  
533 Protect Coastal Regions and Increase Their Resilience, edited by C. N. Bianchi, *PLOS ONE*, 11(7), e0158094,  
534 doi:10.1371/journal.pone.0158094, 2016.
- 535 Guerra, C. A., Maes, J., Geijzendorffer, I. and Metzger, M. J.: An assessment of soil erosion prevention by vegetation  
536 in Mediterranean Europe: Current trends of ecosystem service provision, *Ecol. Indic.*, 60, 213–222,  
537 doi:10.1016/j.ecolind.2015.06.043, 2016.
- 538 Guisan, A. and Thuiller, W.: Predicting species distribution: offering more than simple habitat models, *Ecol. Lett.*,  
539 8(9), 993–1009, doi:10.1111/j.1461-0248.2005.00792.x, 2005.
- 540 Guisan, A. and Zimmermann, N. E.: Predictive habitat distribution models in ecology, *Ecol. Model.*, 135(2–3), 147–  
541 186, doi:10.1016/S0304-3800(00)00354-9, 2000.
- 542 Harfoot, M., Tittensor, D. P., Newbold, T., McInerny, G., Smith, M. J. and Scharlemann, J. P. W.: Integrated  
543 assessment models for ecologists: the present and the future: Integrated assessment models for ecologists, *Glob. Ecol.*  
544 *Biogeogr.*, 23(2), 124–143, doi:10.1111/geb.12100, 2014a.
- 545 Harfoot, M. B. J., Newbold, T., Tittensor, D. P., Emmott, S., Hutton, J., Lyutsarev, V., Smith, M. J., Scharlemann, J. P.  
546 W. and Purves, D. W.: Emergent Global Patterns of Ecosystem Structure and Function from a Mechanistic General  
547 Ecosystem Model, edited by M. Loreau, *PLoS Biol.*, 12(4), e1001841, doi:10.1371/journal.pbio.1001841, 2014b.



- 548 Haverd, V., Smith, B., Nieradzki, L., Briggs, P. R., Woodgate, W., Trudinger, C. M. and Canadell, J. G.: A new  
549 version of the CABLE land surface model (Subversion revision r4546), incorporating land use and land cover change,  
550 woody vegetation demography and a novel optimisation-based approach to plant coordination of electron transport and  
551 carboxylation capacity-limited photosynthesis, *Geosci. Model Dev. Discuss.*, 1–33, doi:10.5194/gmd-2017-265, 2017.
- 552 Heinemann, A., Mertz, O., Frohling, S., Egelund Christensen, A., Hurni, K., Sedano, F., Parsons Chini, L., Sahajpal,  
553 R., Hansen, M. and Hurtt, G.: A global view of shifting cultivation: Recent, current, and future extent, edited by B.  
554 Poulter, *PLOS ONE*, 12(9), e0184479, doi:10.1371/journal.pone.0184479, 2017.
- 555 Hempel, S., Frieler, K., Warszawski, L., Schewe, J. and Piontek, F.: A trend-preserving bias correction &ndash; the  
556 ISI-MIP approach, *Earth Syst. Dyn.*, 4(2), 219–236, doi:10.5194/esd-4-219-2013, 2013.
- 557 Hirsch, T. and Secretariat of the Convention on Biological Diversity, Eds.: *Global biodiversity outlook 3*, Secretariat  
558 of the Convention on Biological Diversity, Montreal, Quebec, Canada., 2010.
- 559 Hoskins, A.J., Harwood, T.D., Ware, C., Williams, K.J., Perry, J.J., Ota, N., Croft, J.R., Yeates, D.K., Jetz, W., Golebiewski,  
560 M., Ferrier, S.: BILBI: supporting global biodiversity assessment through high-resolution macroecological modelling. [in  
561 prep.]
- 562 Hudson, L. N., Newbold, T., Contu, S., Hill, S. L. L., Lysenko, I., De Palma, A., Phillips, H. R. P., Senior, R. A.,  
563 Bennett, D. J., Booth, H., Choimes, A., Correia, D. L. P., Day, J., Echeverría-Londoño, S., Garon, M., Harrison, M. L.  
564 K., Ingram, D. J., Jung, M., Kemp, V., Kirkpatrick, L., Martin, C. D., Pan, Y., White, H. J., Aben, J., Abrahamczyk, S.,  
565 Adum, G. B., Aguilar-Barquero, V., Aizen, M. A., Ancrenaz, M., Arbeláez-Cortés, E., Armbrrecht, I., Azhar, B.,  
566 Azpiroz, A. B., Baeten, L., Báldi, A., Banks, J. E., Barlow, J., Batáry, P., Bates, A. J., Bayne, E. M., Beja, P., Berg, Å.,  
567 Berry, N. J., Bicknell, J. E., Bihn, J. H., Böhning-Gaese, K., Boekhout, T., Boutin, C., Bouyer, J., Brearley, F. Q.,  
568 Brito, I., Brunet, J., Buczkowski, G., Buscardo, E., Cabra-García, J., Calviño-Cancela, M., Cameron, S. A., Canello,  
569 E. M., Carrijo, T. F., Carvalho, A. L., Castro, H., Castro-Luna, A. A., Cerda, R., Cerezo, A., Chauvat, M., Clarke, F.  
570 M., Cleary, D. F. R., Connop, S. P., D’Aniello, B., da Silva, P. G., Darvill, B., Dauber, J., Dejean, A., Diekötter, T.,  
571 Dominguez-Haydar, Y., Dormann, C. F., Dumont, B., Dures, S. G., Dynesius, M., Edenius, L., Elek, Z., Entling, M.  
572 H., Farwig, N., Fayle, T. M., Felicioli, A., Felton, A. M., Ficitola, G. F., Filgueiras, B. K. C., Fonte, S. J., Fraser, L.  
573 H., Fukuda, D., Furlani, D., Ganzhorn, J. U., Garden, J. G., Gheler-Costa, C., Giordani, P., Giordano, S., Gottschalk,  
574 M. S., Goulson, D., et al.: The PREDICTS database: a global database of how local terrestrial biodiversity responds to  
575 human impacts, *Ecol. Evol.*, 4(24), 4701–4735, doi:10.1002/ece3.1303, 2014.
- 576 Hurtt, G. C., Chini, L. P., Frohling, S., Betts, R. A., Feddema, J., Fischer, G., Fisk, J. P., Hibbard, K., Houghton, R. A.,  
577 Janetos, A., Jones, C. D., Kindermann, G., Kinoshita, T., Klein Goldewijk, K., Riahi, K., Shevliakova, E., Smith, S.,  
578 Stehfest, E., Thomson, A., Thornton, P., van Vuuren, D. P. and Wang, Y. P.: Harmonization of land-use scenarios for  
579 the period 1500–2100: 600 years of global gridded annual land-use transitions, wood harvest, and resulting secondary  
580 lands, *Clim. Change*, 109(1–2), 117–161, doi:10.1007/s10584-011-0153-2, 2011.
- 581 Hurtt, G., Chini, L., Sahajpal, R., Frohling, S., Calvin, K., Fujimori, S., Klein Goldewijk, K., Hasegawa, T., Havlik, P.,  
582 Lawrence, D., Lawrence, P., Popp, A., Stehfest, E., van Vuuren, D., and Zhang, X.: Harmonization of global land-use  
583 change and management for the period 850–2100. [submitted]
- 584 IPBES: The methodological assessment report on scenarios and models of biodiversity and ecosystem services: S. Ferrier, K.  
585 N. Ninan, P. Leadley, R. Alkemade, L. A. Acosta, H. R. Akçakaya, L. Brotons, W. W. L. Cheung, V. Christensen, K. A.  
586 Harhash, J. Kabubo-Mariara, C. Lundquist, M. Obersteiner, H. M. Pereira, G. Peterson, R. Pichs-Madruga, N. Ravindranath,  
587 C. Rondinini and B. A. Wintle (eds.), Secretariat of the Intergovernmental Science-Policy Platform on Biodiversity and  
588 Ecosystem Services, Bonn, Germany, 348 pages, 2016.

- 589 **Figure 1:** Input-models-output flowchart of BES-SIM  
590 Janse J.H., M. Bakkenes & J. Meijer: Globio-Aquatic, Technical model description v. 1.3: PBL publication 2829, The  
591 Hague, PBL Netherlands Environmental Assessment Agency, 2016.
- 592 Janse, J. H., Kuiper, J. J., Weijters, M. J., Westerbeek, E. P., Jeuken, M. H. J. L., Bakkenes, M., Alkemade, R., Mooij,  
593 W. M. and Verhoeven, J. T. A.: GLOBIO-Aquatic, a global model of human impact on the biodiversity of inland  
594 aquatic ecosystems, *Environ. Sci. Policy*, 48, 99–114, doi:10.1016/j.envsci.2014.12.007, 2015.
- 595 Jantz, S. M., Barker, B., Brooks, T. M., Chini, L. P., Huang, Q., Moore, R. M., Noel, J. and Hurtt, G. C.: Future habitat  
596 loss and extinctions driven by land-use change in biodiversity hotspots under four scenarios of climate-change  
597 mitigation: Future Habitat Loss and Extinctions, *Conserv. Biol.*, 29(4), 1122–1131, doi:10.1111/cobi.12549, 2015.
- 598 Jetz, W., Wilcove, D. S. and Dobson, A. P.: Projected Impacts of Climate and Land-Use Change on the Global  
599 Diversity of Birds, edited by G. M. Mace, *PLoS Biol.*, 5(6), e157, doi:10.1371/journal.pbio.0050157, 2007.
- 600 Johnson, J. A., Runge, C. F., Senauer, B., Foley, J. and Polasky, S.: Global agriculture and carbon trade-offs, *Proc.*  
601 *Natl. Acad. Sci.*, 111(34), 12342–12347, doi:10.1073/pnas.1412835111, 2014.
- 602 Johnson, J. A., Runge, C. F., Senauer, B. and Polasky, S.: Global Food Demand and Carbon-Preserving Cropland  
603 Expansion under Varying Levels of Intensification, *Land Econ.*, 92(4), 579–592, doi:10.3368/le.92.4.579, 2016.
- 604 Jungclaus, J. H., Bard, E., Baroni, M., Braconnot, P., Cao, J., Chini, L. P., Egorova, T., Evans, M., González-Rouco, J.  
605 F., Goosse, H., Hurtt, G. C., Joos, F., Kaplan, J. O., Khodri, M., Klein Goldewijk, K., Krivova, N., LeGrande, A. N.,  
606 Lorenz, S. J., Luterbacher, J., Man, W., Maycock, A. C., Meinshausen, M., Moberg, A., Muscheler, R., Nehrbass-  
607 Ahles, C., Otto-Bliesner, B. I., Phipps, S. J., Pongratz, J., Rozanov, E., Schmidt, G. A., Schmidt, H., Schmutz, W.,  
608 Schurer, A., Shapiro, A. I., Sigl, M., Smerdon, J. E., Solanki, S. K., Timmreck, C., Toohey, M., Usoskin, I. G.,  
609 Wagner, S., Wu, C.-J., Yeo, K. L., Zanchettin, D., Zhang, Q. and Zorita, E.: The PMIP4 contribution to CMIP6 – Part  
610 3: The last millennium, scientific objective, and experimental design for the PMIP4 &lt;i>past1000</i> &lt;i>simulations</i>,  
611 *Geosci. Model Dev.*, 10(11), 4005–4033, doi:10.5194/gmd-10-4005-2017, 2017.
- 612 Knorr, W., Arneith, A. and Jiang, L.: Demographic controls of future global fire risk, *Nat. Clim. Change*, 6(8), 781–  
613 785, doi:10.1038/nclimate2999, 2016.
- 614 Kriegler, E., Bauer, N., Popp, A., Humpenöder, F., Leimbach, M., Strefler, J., Baumstark, L., Bodirsky, B. L., Hilaire,  
615 J., Klein, D., Mouratiadou, I., Weindl, I., Bertram, C., Dietrich, J.-P., Luderer, G., Pehl, M., Pietzcker, R., Piontek, F.,  
616 Lotze-Campen, H., Biewald, A., Bonsch, M., Giannousakis, A., Kreidenweis, U., Müller, C., Rolinski, S., Schultes, A.,  
617 Schwanitz, J., Stevanovic, M., Calvin, K., Emmerling, J., Fujimori, S. and Edenhofer, O.: Fossil-fueled development  
618 (SSP5): An energy and resource intensive scenario for the 21st century, *Glob. Environ. Change*, 42, 297–315,  
619 doi:10.1016/j.gloenvcha.2016.05.015, 2017.
- 620 Lawrence, D. M., Hurtt, G. C., Arneith, A., Brovkin, V., Calvin, K. V., Jones, A. D., Jones, C. D., Lawrence, P. J., de  
621 Noblet-Ducoudré, N., Pongratz, J., Seneviratne, S. I. and Shevliakova, E.: The Land Use Model Intercomparison  
622 Project (LUMIP) contribution to CMIP6: rationale and experimental design, *Geosci. Model Dev.*, 9(9), 2973–2998,  
623 doi:10.5194/gmd-9-2973-2016, 2016.
- 624 Leadley, P.W., Krug, C.B., Alkemade, R., Pereira, H.M., Sumaila U.R., Walpole, M., Marques, A., Newbold, T., Teh, L.S.L,  
625 van Kolck, J., Bellard, C., Januchowski-Hartley, S.R. and Mumby, P.J.: Progress towards the Aichi Biodiversity Targets: An  
626 Assessment of Biodiversity Trends, Policy Scenarios and Key Actions. Secretariat of the Convention on Biological Diversity,  
627 Montreal, Canada, Technical Series 78, 500 pages, 2014.
- 628 Lehsten, V., Sykes, M. T., Scott, A. V., Tzanopoulos, J., Kallimanis, A., Mazaris, A., Verburg, P. H., Schulp, C. J. E.,  
629 Potts, S. G. and Vogiatzakis, I.: Disentangling the effects of land-use change, climate and CO<sub>2</sub> on projected future  
630 European habitat types: Disentangling the drivers of habitat change, *Glob. Ecol. Biogeogr.*, 24(6), 653–663,  
631 doi:10.1111/geb.12291, 2015.

- 632 Lindeskog, M., Arneth, A., Bondeau, A., Waha, K., Seaquist, J., Olin, S. and Smith, B.: Implications of accounting for  
633 land use in simulations of ecosystem carbon cycling in Africa, *Earth Syst. Dyn.*, 4(2), 385–407, doi:10.5194/esd-4-  
634 385-2013, 2013.
- 635 Martins, I. S. and Pereira, H. M.: Improving extinction projections across scales and habitats using the countryside  
636 species-area relationship, *Sci. Rep.*, 7(1), doi:10.1038/s41598-017-13059-y, 2017.
- 637 Maxwell, S. L., Fuller, R. A., Brooks, T. M. and Watson, J. E. M.: Biodiversity: The ravages of guns, nets and  
638 bulldozers, *Nature*, 536(7615), 143–145, doi:10.1038/536143a, 2016.
- 639 McSweeney, C. F. and Jones, R. G.: How representative is the spread of climate projections from the 5 CMIP5 GCMs  
640 used in ISI-MIP?, *Clim. Serv.*, 1, 24–29, doi:10.1016/j.cliser.2016.02.001, 2016.
- 641 Meinshausen, M., Wigley, T. M. L. and Raper, S. C. B.: Emulating atmosphere-ocean and carbon cycle models with a  
642 simpler model, MAGICC6 – Part 2: Applications, *Atmospheric Chem. Phys.*, 11(4), 1457–1471, doi:10.5194/acp-11-  
643 1457-2011, 2011a.
- 644 Meinshausen, M., Raper, S. C. B. and Wigley, T. M. L.: Emulating coupled atmosphere-ocean and carbon cycle  
645 models with a simpler model, MAGICC6 – Part 1: Model description and calibration, *Atmospheric Chem. Phys.*,  
646 11(4), 1417–1456, doi:10.5194/acp-11-1417-2011, 2011b.
- 647 Merow, C., Smith, M. J. and Silander, J. A.: A practical guide to MaxEnt for modeling species’ distributions: what it  
648 does, and why inputs and settings matter, *Ecography*, 36(10), 1058–1069, doi:10.1111/j.1600-0587.2013.07872.x,  
649 2013.
- 650 Millennium Ecosystem Assessment (Program), Ed.: *Ecosystems and human well-being: synthesis*, Island Press,  
651 Washington, DC., 2005.
- 652 Monfreda, C., Ramankutty, N. and Foley, J. A.: Farming the planet: 2. Geographic distribution of crop areas, yields,  
653 physiological types, and net primary production in the year 2000: GLOBAL CROP AREAS AND YIELDS IN 2000,  
654 *Glob. Biogeochem. Cycles*, 22(1), n/a-n/a, doi:10.1029/2007GB002947, 2008.
- 655 Moss, R. H., Edmonds, J. A., Hibbard, K. A., Manning, M. R., Rose, S. K., van Vuuren, D. P., Carter, T. R., Emori, S.,  
656 Kainuma, M., Kram, T., Meehl, G. A., Mitchell, J. F. B., Nakicenovic, N., Riahi, K., Smith, S. J., Stouffer, R. J.,  
657 Thomson, A. M., Weyant, J. P. and Wilbanks, T. J.: The next generation of scenarios for climate change research and  
658 assessment, *Nature*, 463(7282), 747–756, doi:10.1038/nature08823, 2010.
- 659 Newbold, T., Hudson, L. N., Arnell, A. P., Contu, S., De Palma, A., Ferrier, S., Hill, S. L. L., Hoskins, A. J., Lysenko,  
660 I., Phillips, H. R. P., Burton, V. J., Chng, C. W. T., Emerson, S., Gao, D., Pask-Hale, G., Hutton, J., Jung, M.,  
661 Sanchez-Ortiz, K., Simmons, B. I., Whitmee, S., Zhang, H., Scharlemann, J. P. W. and Purvis, A.: Has land use pushed  
662 terrestrial biodiversity beyond the planetary boundary? A global assessment, *Science*, 353(6296), 288–291,  
663 doi:10.1126/science.aaf2201, 2016.
- 664 Ohashi, H., Hasegawa, T., Hirata, A., Fujimori, S., Takahashi, K., Hijioka, Y., Nakao, K., Tsuyama, I., Kominami, Y., Tanaka,  
665 N., Matsui, T.: Long-term climate change impact is more harmful than 2°C climate mitigation land use change. [in prep.]
- 666 Olin, S., Schurgers, G., Lindeskog, M., Wårlind, D., Smith, B., Bodin, P., Holmér, J. and Arneth, A.: Modelling the  
667 response of yields and tissue C : N to changes in atmospheric CO<sub>2</sub> and N management in the main wheat regions of  
668 western Europe, *Biogeosciences*, 12(8), 2489–2515, doi:10.5194/bg-12-2489-2015, 2015.
- 669 O’Neill, B. C., Tebaldi, C., van Vuuren, D. P., Eyring, V., Friedlingstein, P., Hurtt, G., Knutti, R., Kriegler, E.,  
670 Lamarque, J.-F., Lowe, J., Meehl, G. A., Moss, R., Riahi, K. and Sanderson, B. M.: The Scenario Model  
671 Intercomparison Project (ScenarioMIP) for CMIP6, *Geosci. Model Dev.*, 9(9), 3461–3482, doi:10.5194/gmd-9-3461-  
672 2016, 2016.

- 673 O'Neill, B. C., Kriegler, E., Ebi, K. L., Kemp-Benedict, E., Riahi, K., Rothman, D. S., van Ruijven, B. J., van Vuuren,  
674 D. P., Birkmann, J., Kok, K., Levy, M. and Solecki, W.: The roads ahead: Narratives for shared socioeconomic  
675 pathways describing world futures in the 21st century, *Glob. Environ. Change*, 42, 169–180,  
676 doi:10.1016/j.gloenvcha.2015.01.004, 2017.
- 677 Pecl, G. T., Araújo, M. B., Bell, J. D., Blanchard, J., Bonebrake, T. C., Chen, I.-C., Clark, T. D., Colwell, R. K.,  
678 Danielsen, F., Evengård, B., Falconi, L., Ferrier, S., Frusher, S., Garcia, R. A., Griffis, R. B., Hobday, A. J., Janion-  
679 Scheepers, C., Jarzyna, M. A., Jennings, S., Lenoir, J., Linnetved, H. I., Martin, V. Y., McCormack, P. C., McDonald,  
680 J., Mitchell, N. J., Mustonen, T., Pandolfi, J. M., Pettoelli, N., Popova, E., Robinson, S. A., Scheffers, B. R., Shaw, J.  
681 D., Sorte, C. J. B., Strugnell, J. M., Sunday, J. M., Tuanmu, M.-N., Vergés, A., Villanueva, C., Wernberg, T., Wapstra,  
682 E. and Williams, S. E.: Biodiversity redistribution under climate change: Impacts on ecosystems and human well-  
683 being, *Science*, 355(6332), eaai9214, doi:10.1126/science.aai9214, 2017.
- 684 Pereira, H. M., Leadley, P. W., Proenca, V., Alkemade, R., Scharlemann, J. P. W., Fernandez-Manjarres, J. F., Araujo,  
685 M. B., Balvanera, P., Biggs, R., Cheung, W. W. L., Chini, L., Cooper, H. D., Gilman, E. L., Guenette, S., Hurtt, G. C.,  
686 Huntington, H. P., Mace, G. M., Oberdorff, T., Revenga, C., Rodrigues, P., Scholes, R. J., Sumaila, U. R. and Walpole,  
687 M.: Scenarios for Global Biodiversity in the 21st Century, *Science*, 330(6010), 1496–1501,  
688 doi:10.1126/science.1196624, 2010.
- 689 Popp, A., Calvin, K., Fujimori, S., Havlik, P., Humpenöder, F., Stehfest, E., Bodirsky, B. L., Dietrich, J. P., Doelmann,  
690 J. C., Gusti, M., Hasegawa, T., Kyle, P., Obersteiner, M., Tabeau, A., Takahashi, K., Valin, H., Waldhoff, S., Weindl,  
691 I., Wise, M., Kriegler, E., Lotze-Campen, H., Fricko, O., Riahi, K. and Vuuren, D. P. van: Land-use futures in the  
692 shared socio-economic pathways, *Glob. Environ. Change*, 42, 331–345, doi:10.1016/j.gloenvcha.2016.10.002, 2017.
- 693 Poulter, B., Frank, D. C., Hodson, E. L. and Zimmermann, N. E.: Impacts of land cover and climate data selection on  
694 understanding terrestrial carbon dynamics and the CO<sub>2</sub> airborne fraction, *Biogeosciences*, 8(8), 2027–2036,  
695 doi:10.5194/bg-8-2027-2011, 2011.
- 696 Prentice, I. C., Bondeau, A., Cramer, W., Harrison, S. P., Hickler, T., Lucht, W., Sitch, S., Smith, B. and Sykes, M. T.:  
697 Dynamic Global Vegetation Modeling: Quantifying Terrestrial Ecosystem Responses to Large-Scale Environmental  
698 Change, in *Terrestrial Ecosystems in a Changing World*, edited by J. G. Canadell, D. E. Pataki, and L. F. Pitelka, pp.  
699 175–192, Springer Berlin Heidelberg, Berlin, Heidelberg., 2007.
- 700 Purvis, A., Newbold, T., De Palma, A., Contu, S., Hill, S. L. L., Sanchez-Ortiz, K., Phillips, H. R. P., Hudson, L. N.,  
701 Lysenko, I., Börger, L. and Scharlemann, J. P. W.: Modelling and Projecting the Response of Local Terrestrial  
702 Biodiversity Worldwide to Land Use and Related Pressures: The PREDICTS Project, in *Advances in Ecological  
703 Research*, vol. 58, pp. 201–241, Elsevier., 2018.
- 704 Rabin, S. S., Melton, J. R., Lasslop, G., Bachelet, D., Forrest, M., Hantson, S., Kaplan, J. O., Li, F., Mangeon, S.,  
705 Ward, D. S., Yue, C., Arora, V. K., Hickler, T., Kloster, S., Knorr, W., Nieradzic, L., Spessa, A., Folberth, G. A.,  
706 Sheehan, T., Voulgarakis, A., Kelley, D. I., Prentice, I. C., Sitch, S., Harrison, S. and Arneth, A.: The Fire Modeling  
707 Intercomparison Project (FireMIP), phase 1: experimental and analytical protocols with detailed model descriptions,  
708 *Geosci. Model Dev.*, 10(3), 1175–1197, doi:10.5194/gmd-10-1175-2017, 2017.
- 709 Redhead, J. W., May, L., Oliver, T. H., Hamel, P., Sharp, R. and Bullock, J. M.: National scale evaluation of the  
710 InVEST nutrient retention model in the United Kingdom, *Sci. Total Environ.*, 610–611, 666–677,  
711 doi:10.1016/j.scitotenv.2017.08.092, 2018.
- 712 Riahi, K., van Vuuren, D. P., Kriegler, E., Edmonds, J., O'Neill, B. C., Fujimori, S., Bauer, N., Calvin, K., Dellink, R.,  
713 Fricko, O., Lutz, W., Popp, A., Cuaresma, J. C., Kc, S., Leimbach, M., Jiang, L., Kram, T., Rao, S., Emmerling, J.,  
714 Ebi, K., Hasegawa, T., Havlik, P., Humpenöder, F., Da Silva, L. A., Smith, S., Stehfest, E., Bosetti, V., Eom, J.,  
715 Gernaat, D., Masui, T., Rogelj, J., Strefler, J., Drouet, L., Krey, V., Luderer, G., Harmsen, M., Takahashi, K.,

- 716 Baumstark, L., Doelman, J. C., Kainuma, M., Klimont, Z., Marangoni, G., Lotze-Campen, H., Obersteiner, M.,  
717 Tabeau, A. and Tavoni, M.: The Shared Socioeconomic Pathways and their energy, land use, and greenhouse gas  
718 emissions implications: An overview, *Glob. Environ. Change*, 42, 153–168, doi:10.1016/j.gloenvcha.2016.05.009,  
719 2017.
- 720 Rondinini, C., Di Marco, M., Chiozza, F., Santulli, G., Baisero, D., Visconti, P., Hoffmann, M., Schipper, J., Stuart, S.  
721 N., Tognelli, M. F., Amori, G., Falcucci, A., Maiorano, L. and Boitani, L.: Global habitat suitability models of  
722 terrestrial mammals, *Philos. Trans. R. Soc. B Biol. Sci.*, 366(1578), 2633–2641, doi:10.1098/rstb.2011.0113, 2011.
- 723 Rosa, I. M., Pereira, H. M., Ferrier, S., Alkemade, R., Acosta, L. A., Akcakaya, H. R., den Belder, E., Fazel, A. M.,  
724 Fujimori, S. and Harfoot, M.: Multiscale scenarios for nature futures, *Nat. Ecol. Evol.*, 1(10), 1416, 2017.
- 725 Rosenzweig, C., Arnell, N. W., Ebi, K. L., Lotze-Campen, H., Raes, F., Rapley, C., Smith, M. S., Cramer, W., Frieler,  
726 K., Reyer, C. P. O., Schewe, J., van Vuuren, D. and Warszawski, L.: Assessing inter-sectoral climate change risks: the  
727 role of ISIMIP, *Environ. Res. Lett.*, 12(1), 010301, doi:10.1088/1748-9326/12/1/010301, 2017.
- 728 Sala, O. E.: Global Biodiversity Scenarios for the Year 2100, *Science*, 287(5459), 1770–1774,  
729 doi:10.1126/science.287.5459.1770, 2000.
- 730 Schipper, A.M., Bakkenes, M., Meijer, J.R., Alkemade, R., Huijbregts, M.J.: The GLOBIO model. A technical description of  
731 version 3.5. PBL publication 2369, The Hague, PBL Netherlands Environmental Assessment Agency, 2016.
- 732 Schulp, C. J. E., Alkemade, R., Klein Goldewijk, K. and Petz, K.: Mapping ecosystem functions and services in  
733 Eastern Europe using global-scale data sets, *Int. J. Biodivers. Sci. Ecosyst. Serv. Manag.*, 8(1–2), 156–168,  
734 doi:10.1080/21513732.2011.645880, 2012.
- 735 Secretariat of the Convention on Biological Diversity and United Nations Environment Programme, Eds.: Global  
736 biodiversity outlook 4: a mid-term assessment of progress towards the implementation of the strategic plan for  
737 biodiversity 2011-2020, Secretariat for the Convention on Biological Diversity, Montreal, Quebec, Canada., 2014.
- 738 Settele, J., Scholes, R., Betts, R. A., Bunn, S., Leadley, P., Nepstad, D., ... Winter, M.: Terrestrial and Inland water systems:  
739 in, *Climate Change 2014 Impacts, Adaptation and Vulnerability: Part A: Global and Sectoral Aspects* (pp. 271-360),  
740 Cambridge University Press, DOI: 10.1017/CBO9781107415379.009, 2015.
- 741 Sharp, R., Tallis, H.T., Ricketts, T., Guerry, A.D., Wood, S.A., Chaplin-Kramer, R., Nelson, E., Ennaanay, D., Wolny, S.,  
742 Olwero, N., Vigerstol, K., Pennington, D., Mendoza, G., Aukema, J., Foster, J., Forrest, J., Cameron, D., Arkema, K.,  
743 Lonsdorf, E., Kennedy, C., Verutes, G., Kim, C.K., Guannel, G., Papenfus, M., Toft, J., Marsik, M., Bernhardt, J., Griffin,  
744 R., Glowinski, K., Chaumont, N., Perelman, A., Lacayo, M. Mandle, L., Hamel, P., Vogl, A.L., Rogers, L., Bierbower, W.,  
745 Denu, D., and Douglass, J.: *InVEST +VERSION+ User’s Guide*, The Natural Capital Project, Stanford University,  
746 University of Minnesota, The Nature Conservancy, and World Wildlife Fund, 2018.
- 747 Sitch, S., Smith, B., Prentice, I. C., Arneth, A., Bondeau, A., Cramer, W., Kaplan, J. O., Levis, S., Lucht, W., Sykes,  
748 M. T., Thonicke, K. and Venevsky, S.: Evaluation of ecosystem dynamics, plant geography and terrestrial carbon  
749 cycling in the LPJ dynamic global vegetation model, *Glob. Change Biol.*, 9(2), 161–185, doi:10.1046/j.1365-  
750 2486.2003.00569.x, 2003.
- 751 Smith, B., Wårlind, D., Arneth, A., Hickler, T., Leadley, P., Siltberg, J. and Zaehle, S.: Implications of incorporating N  
752 cycling and N limitations on primary production in an individual-based dynamic vegetation model, *Biogeosciences*,  
753 11(7), 2027–2054, doi:10.5194/bg-11-2027-2014, 2014.
- 754 Stehfest, E., van Vuuren, D., Kram, T., Bouwman, L., Alkemade, R., Bakkenes, M., Biemans, H., Bouwman, A., den Elzen,  
755 M., Janse, J., Lucas, P., van Minnen, J., Müller, M., Prins, A.: *Integrated Assessment of Global Environmental Change with*  
756 *IMAGE 3.0. Model description and policy applications*, The Hague: PBL Netherlands Environmental Assessment Agency,  
757 2014.

- 758 Thuiller, W.: Patterns and uncertainties of species' range shifts under climate change, *Glob. Change Biol.*, 10(12),  
759 2020–2027, doi:10.1111/j.1365-2486.2004.00859.x, 2004.
- 760 Thuiller, W., Lafourcade, B., Engler, R. and Araújo, M. B.: BIOMOD - a platform for ensemble forecasting of species  
761 distributions, *Ecography*, 32(3), 369–373, doi:10.1111/j.1600-0587.2008.05742.x, 2009.
- 762 Thuiller, W., Lavergne, S., Roquet, C., Boulangeat, I., Lafourcade, B. and Araujo, M. B.: Consequences of climate  
763 change on the tree of life in Europe, *Nature*, 470(7335), 531–534, doi:10.1038/nature09705, 2011.
- 764 Thuiller, W., Münkemüller, T., Lavergne, S., Mouillot, D., Mouquet, N., Schiffers, K. and Gravel, D.: A road map for  
765 integrating eco-evolutionary processes into biodiversity models, edited by M. Holyoak, *Ecol. Lett.*, 16, 94–105,  
766 doi:10.1111/ele.12104, 2013.
- 767 Titeux, N., Henle, K., Mihoub, J.-B., Regos, A., Geijzendorffer, I. R., Cramer, W., Verburg, P. H. and Brotons, L.:  
768 Biodiversity scenarios neglect future land-use changes, *Glob. Change Biol.*, 22(7), 2505–2515, doi:10.1111/gcb.13272,  
769 2016.
- 770 Titeux, N., Henle, K., Mihoub, J.-B., Regos, A., Geijzendorffer, I. R., Cramer, W., Verburg, P. H. and Brotons, L.:  
771 Global scenarios for biodiversity need to better integrate climate and land use change, edited by A. Syphard, *Divers.*  
772 *Distrib.*, 23(11), 1231–1234, doi:10.1111/ddi.12624, 2017.
- 773 United Nations Environment Programme: UNEP-SETAC Life Cycle Initiative: Global Guidance for Life Cycle Impact  
774 Assessment Indicators - Volume 1, 2016.
- 775 Visconti, P., Bakkenes, M., Baisero, D., Brooks, T., Butchart, S. H. M., Joppa, L., Alkemade, R., Di Marco, M.,  
776 Santini, L., Hoffmann, M., Maiorano, L., Pressey, R. L., Arponen, A., Boitani, L., Reside, A. E., van Vuuren, D. P. and  
777 Rondinini, C.: Projecting Global Biodiversity Indicators under Future Development Scenarios: Projecting biodiversity  
778 indicators, *Conserv. Lett.*, 9(1), 5–13, doi:10.1111/conl.12159, 2016.
- 779 van Vuuren, D. P., Edmonds, J., Kainuma, M., Riahi, K., Thomson, A., Hibbard, K., Hurtt, G. C., Kram, T., Krey, V.,  
780 Lamarque, J.-F., Masui, T., Meinshausen, M., Nakicenovic, N., Smith, S. J. and Rose, S. K.: The representative  
781 concentration pathways: an overview, *Clim. Change*, 109(1–2), 5–31, doi:10.1007/s10584-011-0148-z, 2011.
- 782 van Vuuren, D. P., Kriegler, E., O'Neill, B. C., Ebi, K. L., Riahi, K., Carter, T. R., Edmonds, J., Hallegatte, S., Kram,  
783 T., Mathur, R. and Winkler, H.: A new scenario framework for Climate Change Research: scenario matrix  
784 architecture, *Clim. Change*, 122(3), 373–386, doi:10.1007/s10584-013-0906-1, 2014.
- 785 van Vuuren, D. P., Stehfest, E., Gernaat, D. E. H. J., Doelman, J. C., van den Berg, M., Harmsen, M., de Boer, H. S.,  
786 Bouwman, L. F., Daioglou, V., Edelenbosch, O. Y., Girod, B., Kram, T., Lassaletta, L., Lucas, P. L., van Meijl, H.,  
787 Müller, C., van Ruijven, B. J., van der Sluis, S. and Tabeau, A.: Energy, land-use and greenhouse gas emissions  
788 trajectories under a green growth paradigm, *Glob. Environ. Change*, 42, 237–250,  
789 doi:10.1016/j.gloenvcha.2016.05.008, 2017.
- 790 Warszawski, L., Frieler, K., Huber, V., Piontek, F., Serdeczny, O. and Schewe, J.: The Inter-Sectoral Impact Model  
791 Intercomparison Project (ISI-MIP): Project framework, *Proc. Natl. Acad. Sci.*, 111(9), 3228–3232,  
792 doi:10.1073/pnas.1312330110, 2014.
- 793 Zhao, J.: Influencing policymakers: Communication, *Nat. Clim. Change*, 7(3), 173–174, doi:10.1038/nclimate3215,  
794 2017.
- 795

**Figure 1:** Input-models-output flowchart of BES-SIM

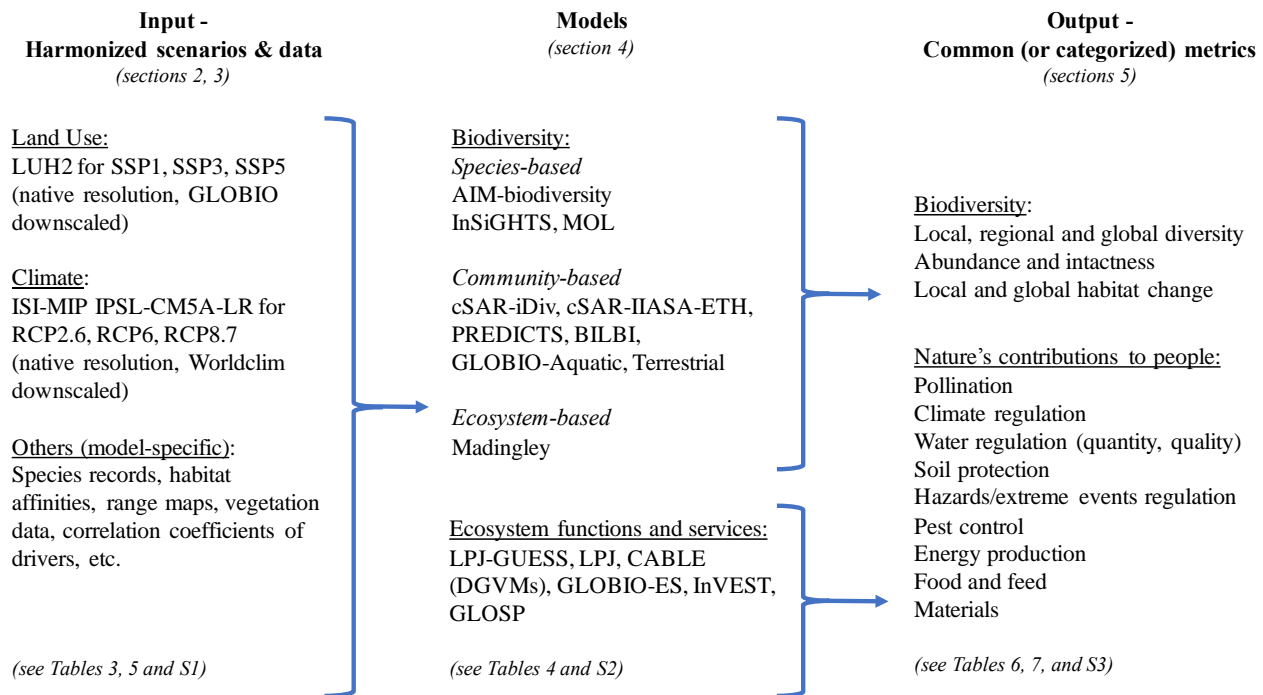

**Table 1:** Characteristics of (a) SSP and (b) RCP scenarios simulated in BES-SIM (adopted from Moss et al., 2010; O'Neill et al., 2017; Popp et al., 2017; van Vuuren et al., 2011)

(a) SSP scenarios

|                                                             | SSP1 Sustainability                                | SSP3 Regional Rivalry                                         | SSP5 Fossil-fuel Development                   |
|-------------------------------------------------------------|----------------------------------------------------|---------------------------------------------------------------|------------------------------------------------|
| Population growth                                           | Relatively low                                     | Low (OECD countries) to high (high fertility countries)       | Relatively low                                 |
| Urbanization                                                | High                                               | Low                                                           | High                                           |
| Equity and social cohesion                                  | High                                               | Low                                                           | High                                           |
| Economic growth                                             | High to medium                                     | Slow                                                          | High                                           |
| International trade and globalization                       | Moderate                                           | Strongly constrained                                          | High                                           |
| Land-use regulation                                         | Strong to avoid environmental trade-off            | Low with continued deforestation due to agriculture expansion | Medium with slow decline in deforestation      |
| Agricultural productivity                                   | High improvements with diffusion of best practices | Low with slow technology development and restricted trade     | Highly managed and resource intensive          |
| Consumption & diet                                          | Low growth in consumption, low-meat                | Resource-intensive consumption                                | Material-intensive consumption, meat-rich diet |
| Environment                                                 | Improving                                          | Serious degradation                                           | Highly successful management                   |
| Carbon intensity                                            | Low                                                | High                                                          | High                                           |
| Energy intensity                                            | Low                                                | High                                                          | High                                           |
| Technology development                                      | Rapid                                              | Slow                                                          | Rapid                                          |
| Institution effectiveness                                   | Effective                                          | Weak                                                          | Increasingly effective                         |
| Policy focus                                                | Sustainable development                            | Security                                                      | Development, free market, human capital        |
| Participation of the land-use sector in mitigation policies | Full                                               | Limited                                                       | Full                                           |
| International cooperation for climate change mitigation     | No delay                                           | Heavy delay                                                   | Delay                                          |

(b) RCP scenarios

|                          | RCP2.6 Low emissions                                             | RCP6.0 Intermediate emissions                                      | RCP8.5 High emissions                                           |
|--------------------------|------------------------------------------------------------------|--------------------------------------------------------------------|-----------------------------------------------------------------|
| Radiative forcing        | Peak at 3W/m <sup>2</sup> before 2100 and decline                | Stabilizes without overshoot pathways to 6W/m <sup>2</sup> in 2100 | Rising forcing pathways leading to 8.5 W/m <sup>2</sup> in 2100 |
| Concentration (p.p.m)    | Peak at 490 CO <sub>2</sub> equiv. before 2100 and then declines | 850 CO <sub>2</sub> equiv. (at stabilization after 2100)           | >1,370 CO <sub>2</sub> equiv. in 2100                           |
| Methane emission         | Reduced                                                          | Stable                                                             | Rapid increase                                                  |
| Reliance on fossil fuels | Decline                                                          | Heavy                                                              | Heavy                                                           |
| Energy intensity         | Low                                                              | Intermediate                                                       | High                                                            |
| Climate policies         | Stringent                                                        |                                                                    | No implementation                                               |



**Table 2:** Sources of input data in BES-SIM.

| BES-SIM model                                     | Land-use data<br>LUH2 v2.0                 |                                       | Climate data                                            |                                                       |                        |
|---------------------------------------------------|--------------------------------------------|---------------------------------------|---------------------------------------------------------|-------------------------------------------------------|------------------------|
|                                                   | Native<br>resolution<br><i>0.25 degree</i> | Downscaled<br>(GLOBIO)<br><i>300m</i> | CMIP5-IPSL<br>Native<br>Resolution<br><i>0.5 degree</i> | CMIP5-IPSL<br>Downscaled<br>(WorldClim)<br><i>1km</i> | IMAGE†<br>(MAGICC 6.0) |
| <b>Species-based models of biodiversity</b>       |                                            |                                       |                                                         |                                                       |                        |
| AIM-biodiversity                                  | *                                          |                                       | *                                                       |                                                       |                        |
| InSiGHTS                                          | *                                          |                                       |                                                         | *                                                     |                        |
| MOL                                               | *                                          |                                       |                                                         | *                                                     |                        |
| <b>Community-based models of biodiversity</b>     |                                            |                                       |                                                         |                                                       |                        |
| cSAR-iDiv                                         | *                                          |                                       |                                                         |                                                       |                        |
| cSAR-IIASA-ETH                                    | *                                          |                                       |                                                         |                                                       |                        |
| BILBI                                             | *                                          |                                       |                                                         | *                                                     |                        |
| PREDICTS                                          | *                                          |                                       |                                                         |                                                       |                        |
| GLOBIO - Aquatic                                  | *                                          |                                       |                                                         |                                                       | *                      |
| GLOBIO4 - Terrestrial                             |                                            | *                                     |                                                         |                                                       | *                      |
| <b>Ecosystems-based model of biodiversity</b>     |                                            |                                       |                                                         |                                                       |                        |
| Madingley                                         | *                                          |                                       | *                                                       |                                                       |                        |
| <b>Models of ecosystem functions and services</b> |                                            |                                       |                                                         |                                                       |                        |
| LPJ-GUESS                                         | *                                          |                                       | *                                                       |                                                       |                        |
| LPJ                                               | *                                          |                                       | *                                                       |                                                       |                        |
| CABLE                                             | *                                          |                                       | *                                                       |                                                       |                        |
| GLOBIO-ES                                         | *                                          |                                       |                                                         |                                                       | *                      |
| InVEST                                            |                                            | *                                     |                                                         | *                                                     |                        |
| GLOSP                                             | *                                          |                                       | *                                                       |                                                       |                        |

†All GLOBIO models use MAGICC climate data from the IMAGE model.

**Table 3:** Improvements made in the Land Use Harmonization v2 (LUH2) dataset from LUH v1 (Hurt et al., 2011)

|                      | LUH v1                                                           | LUH v2                                                                                                                                                                                                                                                                                                                                                                                                            |
|----------------------|------------------------------------------------------------------|-------------------------------------------------------------------------------------------------------------------------------------------------------------------------------------------------------------------------------------------------------------------------------------------------------------------------------------------------------------------------------------------------------------------|
| Spatial resolution   | 0.5 degree                                                       | 0.25 degree                                                                                                                                                                                                                                                                                                                                                                                                       |
| Time steps           | Annually from 1500 to 2100                                       | Annually from 850 to 2100                                                                                                                                                                                                                                                                                                                                                                                         |
| Land use categories  | 5 categories<br>Primary<br>Secondary<br>Pasture<br>Urban<br>Crop | 12 categories<br>Forested primary land (primf)<br>Non-forested primary land (primn)<br>Potentially forested secondary land (secdf)<br>Potentially non-forested secondary land (secdn)<br>Managed pasture (pastr)<br>Rangeland (range)<br>Urban land (urban)<br>C3 annual crops (c3ann)<br>C3 perennial crops (c3per)<br>C4 annual crops (c4ann)<br>C4 perennial crops (c4per)<br>C3 nitrogen-fixing crops (c3nfx) |
| Future               | RCPs (4)<br>2.6<br>4.5<br>6.0<br>8.5                             | SSPs (6)<br>SSP1-RCP2.6<br>SSP4-RCP3.4<br>SSP2-RCP4.5<br>SSP4-RCP6.0<br>SSP3-RCP7.0<br>SSP5-RCP8.5                                                                                                                                                                                                                                                                                                                |
| Land use transitions | <20 per grid cell per year                                       | >100 per grid cell per year                                                                                                                                                                                                                                                                                                                                                                                       |
| Improvements         |                                                                  | <ul style="list-style-type: none"> <li>- New shifting cultivation algorithm</li> <li>- Landsat F/NF change constraint</li> <li>- Expanded diagnostic package</li> <li>- New historical wood harvest reconstruction</li> <li>- Agricultural management layers: irrigation, fertilizer, biofuel crops, wood harvest product split, crop rotations, flooded (rice)</li> </ul>                                        |

**Table 4: Description of biodiversity and ecosystem functions and services models in BES-SIM.**

| BES-SIM Model                                                   | Brief model description                                                                                                                                                                                | Defining features and key processes                                                                                                                                                                                                                                                                                                                                                                                                                                                                | Model modification                                                                                                                                                                                                                                          | Spatial resolution | Time steps             | Taxonomic or functional scope                | Key reference                                   |
|-----------------------------------------------------------------|--------------------------------------------------------------------------------------------------------------------------------------------------------------------------------------------------------|----------------------------------------------------------------------------------------------------------------------------------------------------------------------------------------------------------------------------------------------------------------------------------------------------------------------------------------------------------------------------------------------------------------------------------------------------------------------------------------------------|-------------------------------------------------------------------------------------------------------------------------------------------------------------------------------------------------------------------------------------------------------------|--------------------|------------------------|----------------------------------------------|-------------------------------------------------|
| <b>Species-based models of biodiversity</b>                     |                                                                                                                                                                                                        |                                                                                                                                                                                                                                                                                                                                                                                                                                                                                                    |                                                                                                                                                                                                                                                             |                    |                        |                                              |                                                 |
| AIM-biodiversity (Asia-Pacific Integrated Model – Biodiversity) | A species distribution model that estimates biodiversity loss based projected shift of species range under the conditions of land use and climate change.                                              | Distribution of suitable habitat (land) estimated from climate and land-use data using a statistical model on species presence and climate and land-use classifications, calibrated by historical data.                                                                                                                                                                                                                                                                                            | Please see Table S2 for detailed methodology.                                                                                                                                                                                                               | 0.5 degree         | 1900, 2015, 2050, 2070 | Amphibians, birds, mammals, plants, reptiles | (Ohashi et al., in prep.)                       |
| InSiGHTS                                                        | A high-resolution, cell-wise, species-specific hierarchical species distribution model that estimate the extent of suitable habitat (ESH) for mammals accounting for land and climate suitability.     | Bioclimatic envelope models fitted based on ecologically current reference bioclimatic variables. Species' presence and pseudo-absence records from sampling within and outside of species' ranges. Forecasted layers of land-use/land-cover reclassified according to expert-based species-specific suitability indexes.                                                                                                                                                                          | Increased number of modelled species, new scenarios for climate and land use.                                                                                                                                                                               | 0.25 degree        | 1900, 2015, 2050, 2070 | Mammals                                      | (Rondinini et al., 2011; Visconti et al., 2016) |
| MOL (Map of Life)                                               | An expert map based species distribution model that projects potential losses in species occurrences and geographic range sizes given changes in suitable conditions of climate and land cover change. | Expert maps for terrestrial amphibians, birds and mammals as baseline for projections, combined with downscaled layers for current climate. A penalized point process model estimated individual species niche boundaries, which were projected into 2050 and 2070 to estimate range loss. Species habitat preference-informed land cover associations were used to refine the proportion of suitable habitat in climatically suitable cells with present and future land-cover based projections. | Inductive species distribution modelling was built using point process models to delineate niche boundaries. Binary maps of climatically suitable cells were rescaled (to [0,1]) based on the proportion of the cell within a species land cover preference | 0.25 degree        | 2015, 2050, 2070       | Amphibians, birds, mammals                   | (Jetz et al., 2007; Merow et al., 2013)         |

| BES-SIM Model                                       | Brief model description                                                                                                                                                                                                                                                                  | Defining features and key processes                                                                                                                                                                                                                                                                                                                                                                                                          | Model modification                                                                                                                  | Spatial resolution | Time steps                                            | Taxonomic or functional scope   | Key reference                                 |
|-----------------------------------------------------|------------------------------------------------------------------------------------------------------------------------------------------------------------------------------------------------------------------------------------------------------------------------------------------|----------------------------------------------------------------------------------------------------------------------------------------------------------------------------------------------------------------------------------------------------------------------------------------------------------------------------------------------------------------------------------------------------------------------------------------------|-------------------------------------------------------------------------------------------------------------------------------------|--------------------|-------------------------------------------------------|---------------------------------|-----------------------------------------------|
| BIOMOD2 (BIODiversity MODelling)                    | An R-package that allows running up to nine different algorithms of species distribution models using the same data and the same framework. An ensemble could then be produced allowing a full treatment of uncertainties given the data, algorithms, climate models, climate scenarios. | BIOMOD2 is based on species distribution models that link observed or known presence-absence data to environmental variables (e.g. climate). Each model is cross-validated several times (a random subset of 70% of the data is used for model calibration while 30% are hold out for model evaluation). Models are evaluated using various metrics.                                                                                         |                                                                                                                                     | 100km              | 2015, 2050, 2070                                      | Amphibians, birds, mammals      | (Thuiller, 2004; Thuiller et al., 2009, 2011) |
| <b>Community-based models of biodiversity</b>       |                                                                                                                                                                                                                                                                                          |                                                                                                                                                                                                                                                                                                                                                                                                                                              |                                                                                                                                     |                    |                                                       |                                 |                                               |
| cSAR (Countryside Species Area Relationship) - iDiv | A countryside species-area relationship model that estimates the number of species persisting in a human-modified landscape, accounting for the habitat preferences of different species groups.                                                                                         | Proportional species richness of each species group is a power function of the sum of the areas of each habitat in a landscape, weighted by the affinity of each species group to each habitat type. Species richness is calculated by multiplying the proportional species richness by the number of species known to occur in the area. Total number of species in a landscape is the sum of the number of species for each species group. | Two functional groups of bird species: (1) forest birds; (2) non-forest birds. Habitat affinities retrieved from PREDICTS database. | 0.25 degree        | 1900-2010 (10 years interval), 2015, 2050, 2070, 2090 | Birds (forest, non-forest, all) | (Martins and Pereira, 2017)                   |

| BES-SIM Model                                                                          | Brief model description                                                                                                                                                                                                                                                            | Defining features and key processes                                                                                                                                                                                                                                                                                                                                                                                                                                                                                              | Model modification                                                                                                                                             | Spatial resolution | Time steps                                                    | Taxonomic or functional scope                | Key reference                        |
|----------------------------------------------------------------------------------------|------------------------------------------------------------------------------------------------------------------------------------------------------------------------------------------------------------------------------------------------------------------------------------|----------------------------------------------------------------------------------------------------------------------------------------------------------------------------------------------------------------------------------------------------------------------------------------------------------------------------------------------------------------------------------------------------------------------------------------------------------------------------------------------------------------------------------|----------------------------------------------------------------------------------------------------------------------------------------------------------------|--------------------|---------------------------------------------------------------|----------------------------------------------|--------------------------------------|
| cSAR- IIASA-ETH                                                                        | A countryside species area relationship model that estimates the impact of time series of spatially explicit land-use and land-cover changes on community-level measures of terrestrial biodiversity.                                                                              | Extends concept the SAR to mainland environment where the habitat size depends not only on the extent of the original pristine habitat, but also on the extent and taxon-specific affinity of the other non-pristine land uses and land covers (LULC) of conversion. Affinities derived from field records. Produces the average habitat suitability, regional species richness, and loss of threatened and endemic species for five taxonomic groups.                                                                           | Refined link between LULCC and habitat (gross transitions between LULC classes at each time) and better accounting of time dynamics of converted LULC classes. | 0.25 degree        | 1500-1900 (100 years interval), 1900-2090 (10 years interval) | Amphibians, birds, mammals, plants, reptiles | (Chaudhary et al., 2015; UNEP, 2016) |
| BILBI (Biogeographic modelling Infrastructure for Large-scale Biodiversity Indicators) | A modelling framework that couples application of the species-area relationship with correlative GDM-based modelling of continuous patterns of spatial and temporal turnover in the species composition of communities (applied in this study to vascular plant species globally). | The potential effects of climate scenarios on beta-diversity patterns are estimated through space-for-time projection of compositional-turnover models fitted to present-day biological and environmental data. These projections are then combined with downscaled land-use scenarios to estimate the proportion of species expected to persist within any given region. This employs an extension of species-area modelling designed to work with biologically-scaled environments varying continuously across space and time. | Please see Table S3 for detailed methodology.                                                                                                                  | 1 km (30 arcsec)   | 1900, 2015, 2050                                              | Vascular plants                              | (Ferrier et al., 2004, 2007)         |

| BES-SIM Model                                                                           | Brief model description                                                                                                                                                                                                                                                                             | Defining features and key processes                                                                                                                                                                                                                                                                                                                                                                                                                                                                             | Model modification                                                                                                                                                                                                                                                                                              | Spatial resolution | Time steps | Taxonomic or functional scope | Key reference                               |
|-----------------------------------------------------------------------------------------|-----------------------------------------------------------------------------------------------------------------------------------------------------------------------------------------------------------------------------------------------------------------------------------------------------|-----------------------------------------------------------------------------------------------------------------------------------------------------------------------------------------------------------------------------------------------------------------------------------------------------------------------------------------------------------------------------------------------------------------------------------------------------------------------------------------------------------------|-----------------------------------------------------------------------------------------------------------------------------------------------------------------------------------------------------------------------------------------------------------------------------------------------------------------|--------------------|------------|-------------------------------|---------------------------------------------|
| PREDICTS (Projecting Responses of Ecological Diversity In Changing Terrestrial Systems) | The hierarchical mixed-effects model that estimates how four measures of site-level terrestrial biodiversity – overall abundance, within-sample species richness, abundance-based compositional similarity and richness-based compositional similarity – respond to land use and related pressures. | Models employ data from the PREDICTS database encompassing 767 studies from over 32,000 sites on over 51,000 species. Models assess how alpha diversity is affected by land use, land-use intensity and human population density. Model coefficients are combined with past, present and future maps of the pressure data to make global projections of response variables, which are combined to yield the variants of the Biodiversity Intactness Index (an indicator first proposed by Scholes et al. 2005). | PREDICTS LU classes reclassified for LUH2. Abundance rescaled within each study. Baseline of minimally-used primary vegetation. Compositional similarity models included human population. Study-level mean human population and agricultural suitability used as control variables. Proximity to road omitted. | 0.25 degree        | 900-2100   | All                           | (Newbold et al., 2016; Purvis et al., 2018) |
| GLOBIO (GLOBal BIOdiversity) - Aquatic                                                  | A modelling framework that quantifies the impacts of land-use, eutrophication, climate change and hydrological disturbance on freshwater biodiversity (MSA) and ecosystem functions/services.                                                                                                       | Comprises a set of (mostly correlative) relationships between anthropogenic drivers and biodiversity/ES of rivers, lakes and wetlands. Based on the catchment approach, i.e. the pressures on the aquatic ecosystems are based on what happens in their catchment. Based on the literature.                                                                                                                                                                                                                     |                                                                                                                                                                                                                                                                                                                 | 0.5 degree         | 2015, 2050 | All                           | (Janse et al., 2015, 2016)                  |

| BES-SIM Model                                     | Brief model description                                                                                                                                                                                                                                         | Defining features and key processes                                                                                                                                                                                                                                                                                                                                                                                                                                                                                                                   | Model modification                                                                                                                                                                                                                 | Spatial resolution      | Time steps                         | Taxonomic or functional scope | Key reference           |
|---------------------------------------------------|-----------------------------------------------------------------------------------------------------------------------------------------------------------------------------------------------------------------------------------------------------------------|-------------------------------------------------------------------------------------------------------------------------------------------------------------------------------------------------------------------------------------------------------------------------------------------------------------------------------------------------------------------------------------------------------------------------------------------------------------------------------------------------------------------------------------------------------|------------------------------------------------------------------------------------------------------------------------------------------------------------------------------------------------------------------------------------|-------------------------|------------------------------------|-------------------------------|-------------------------|
| GLOBIO - Terrestrial                              | A modelling framework that quantifies the impacts of multiple anthropogenic pressures on local biodiversity, quantified as the mean species abundance (MSA).                                                                                                    | Based on a set of correlative relationships between biodiversity (MSA) on the one hand and anthropogenic pressures on the other, quantified based on meta-analyses of biodiversity data reported in the literature. Georeferenced layers of the pressure variables are then combined with the response relationships to quantify changes in biodiversity.                                                                                                                                                                                             | Improved land-use allocation routine, improved response relationships for encroachment (hunting)                                                                                                                                   | 10 arc-seconds (~300 m) | 2015, 2050                         | All                           | (Schipper et al., 2016) |
| <b>Ecosystems-based model of biodiversity</b>     |                                                                                                                                                                                                                                                                 |                                                                                                                                                                                                                                                                                                                                                                                                                                                                                                                                                       |                                                                                                                                                                                                                                    |                         |                                    |                               |                         |
| Madingley                                         | An integrated process-based, mechanistic, general ecosystem model that uses a unified set of fundamental ecological concepts and processes to predict the structure and function of the ecosystems at various levels of organisation for marine or terrestrial. | Grouped by heterotroph cohorts, organisms are defined by functional traits rather than the taxonomy. Heterotrophs, defined by categorical (trophic group; hermeregulation strategy; reproductive strategy) and quantitative (current body mass; mass at birth; and mass at reproductive maturity) traits are modelled as individuals dynamically. Simulates the autotroph ecological processes of growth and mortality; and heterotroph metabolism, eating, reproduction, growth, mortality, and dispersal. Dispersal is determined by the body mass. | Incorporation of temporally changing climate, and natural and human impacted plant stocks to better represent the LUHv2 land-use projections. Calculation of functional diversity and dissimilarity to represent community changes | 1 degree                | 1901, 1915-2070 (5 years interval) | Three functional groups?      | (Harfoot et al., 2014b) |
| <b>Models of ecosystem functions and services</b> |                                                                                                                                                                                                                                                                 |                                                                                                                                                                                                                                                                                                                                                                                                                                                                                                                                                       |                                                                                                                                                                                                                                    |                         |                                    |                               |                         |

| BES-SIM Model                                             | Brief model description                                                                                                                                                                                                                                                                     | Defining features and key processes                                                                                                                                                                                                                                                                                                                                                                                                                                                                                                                                                                                        | Model modification                                                                                                                                                                                                      | Spatial resolution | Time steps                         | Taxonomic or functional scope | Key reference                                                   |
|-----------------------------------------------------------|---------------------------------------------------------------------------------------------------------------------------------------------------------------------------------------------------------------------------------------------------------------------------------------------|----------------------------------------------------------------------------------------------------------------------------------------------------------------------------------------------------------------------------------------------------------------------------------------------------------------------------------------------------------------------------------------------------------------------------------------------------------------------------------------------------------------------------------------------------------------------------------------------------------------------------|-------------------------------------------------------------------------------------------------------------------------------------------------------------------------------------------------------------------------|--------------------|------------------------------------|-------------------------------|-----------------------------------------------------------------|
| LPJ-GUESS (Lund-Potsdam-Jena General Ecosystem Simulator) | A process-based “demography enabled” dynamic global vegetation model that computes vegetation and soil state and function, as well as distribution of vegetation units dynamically in space and time in response to climate change, land-use change and N-input.                            | . Vegetation dynamics result from growth and competition for light, space and soil resources among woody plant individuals and herbaceous understorey. A suite of simulated patches per grid cell represents stochastic processes of growth and mortality (succession). Individuals for woody PFTs are identical within an age-cohort. Processes such as photosynthesis, respiration, stomatal conductance are simulated daily. Net primary production (NPP) accrued at the end of each simulation year is allocated to leaves, fine roots and, for woody PFTs, sapwood, resulting in height, diameter and biomass growth. | The model version used here has some updates to the fire model compared to Knorr et al. (2016) see also Rabin et al. (2017). Simulations also accounted for wood harvest, using the modelled recommendations from LUH2. | 0.5 degree         | 1920, 1950, 1970, 2015, 2050, 2070 |                               | (Lindeskog et al., 2013; Olin et al., 2015; Smith et al., 2014) |
| LPJ (Lund-Potsdam-Jena)                                   | A big leaf model that simulates the coupled dynamics of biogeography, biogeochemistry and hydrology under varying climate, atmospheric CO2 concentrations, and land-use land cover change practices to represent demography of grasses and trees in a scale from individuals to landscapes. | Hierarchical representation of the land surface - tiles represent land use with various plant or crop functional types. Implements establishment, mortality, fire, carbon allocation, and land cover change on annual time steps, and calculates photosynthesis, autotrophic respiration, and heterotrophic respiration on daily time steps. Fully prognostic, meaning that PFT distributions and phenology are simulated based on physical principles within a numerical framework.                                                                                                                                       | LPJ represents the full set of states and transitions represented in LUHv2 and improved estimate of carbon fluxes from land-cover change.                                                                               | 0.5 degree         | 1920, 1950, 1970, 2015, 2050, 2070 |                               | (Poulter et al., 2011; Sitch et al., 2003)                      |



| BES-SIM Model                                           | Brief model description                                                                                                                                                                                  | Defining features and key processes                                                                                                                                                                                                                                                                                                                                                                                                                                                        | Model modification                                                                                                          | Spatial resolution | Time steps                                        | Taxonomic or functional scope | Key reference                                      |
|---------------------------------------------------------|----------------------------------------------------------------------------------------------------------------------------------------------------------------------------------------------------------|--------------------------------------------------------------------------------------------------------------------------------------------------------------------------------------------------------------------------------------------------------------------------------------------------------------------------------------------------------------------------------------------------------------------------------------------------------------------------------------------|-----------------------------------------------------------------------------------------------------------------------------|--------------------|---------------------------------------------------|-------------------------------|----------------------------------------------------|
| CABLE<br>(Community Atmosphere Biosphere Land Exchange) | A “demography enabled” global terrestrial biosphere model that computes vegetation and soil state and function dynamically in space and time in response to climate change, land-use change and N-input. | Combines biophysics (coupled photosynthesis, stomatal conductance, canopy energy balance) with daily biogeochemical cycling of carbon and nitrogen (CASA-CNP) and annual patch-based representation of vegetation structural dynamics (POP).<br>Accounts for gross land-use transitions and wood harvest, including effects on patch age distribution in secondary forest. Simulates co-ordination of rate-limiting processes in C3 photosynthesis, as an outcome of fitness maximisation. |                                                                                                                             | 1 degree           | 1920,<br>1950,<br>1970,<br>2015,<br>2050,<br>2070 |                               | (Haverd et al., 2017)                              |
| GLOBIO-Ecosystem Services                               | The model simulates the influence of various anthropogenic drivers on ecosystem functions and services.                                                                                                  | Quantifies a range of provisioning services (e.g. crop production, grass and fodder production, wild food), regulating services (e.g. pest control, pollination, erosion risk reduction, carbon sequestration), and culture services (e.g. nature based tourism) and other measures (e.g. water availability, food risk reduction, harmful algal blooms). Derived from various models, including the IMAGE model and PCR-GLOBWB, and from empirical studies using meta-analysis.           | Relationships between land use and the presence of pollinators and predators updated through additional peer review papers. | 0.5 degree         | 2015,<br>2050,<br>2070                            |                               | (Alkemade et al., 2009, 2014; Schulp et al., 2012) |

| BES-SIM Model                                                     | Brief model description                                                                                                                                    | Defining features and key processes                                                                                                                                                                                                                                                                                                                                                                                                                                                                                         | Model modification                                                                                                                                                           | Spatial resolution    | Time steps | Taxonomic or functional scope | Key reference                                                                                                                                  |
|-------------------------------------------------------------------|------------------------------------------------------------------------------------------------------------------------------------------------------------|-----------------------------------------------------------------------------------------------------------------------------------------------------------------------------------------------------------------------------------------------------------------------------------------------------------------------------------------------------------------------------------------------------------------------------------------------------------------------------------------------------------------------------|------------------------------------------------------------------------------------------------------------------------------------------------------------------------------|-----------------------|------------|-------------------------------|------------------------------------------------------------------------------------------------------------------------------------------------|
| InVEST (Integrated Valuation of Ecosystem Services and Tradeoffs) | A suite of GIS based spatially-explicit models used to map and value the ecosystem goods and services in biophysical or economic terms.                    | 18 models for distinct ecosystem services designed for terrestrial, freshwater, marine and coastal ecosystems. Based on production functions that define how changes in an ecosystem's structure and function are likely to affect the flows and values of ecosystem services across a land- or a seascape. Accounts for both service supply and the location and activities of demand. Modular and selectable.                                                                                                             | The crop-production model was simplified from 175 crops to the 5 crop-types reported in LUH2. Other models have minor simplifications; see tables S2 and S3 for more detail. | 300m and 5 arc-minute | 2015, 2050 |                               | (Arkema et al., 2013; Chaplin-Kramer et al., 2014; Guannel et al., 2016; Johnson et al., 2014, 2016; Redhead et al., 2018; Sharp et al., 2016) |
| GLOSP (GLObal Soil Protection)                                    | A 2D soil erosion model based on the Universal Soil Loss Equation that uses climate and land-use projections to estimate global and local soil protection. | Protected soil (Ps) is defined as the amount of soil that is prevented from being eroded (water erosion) by the mitigating effect of available vegetation. Ps is calculated from the difference between soil erosion (Se) and potential soil erosion (Pse) based on the integration of the joint effect of slope length, rainfall erosivity, and soil erodibility. Soil protection is given by the value of fractional vegetation cover calculated as a function of land use, altitude, precipitation, and soil properties. | Please see Table S3 for detailed methodology.                                                                                                                                | 0.25 degree           | 2015, 2050 |                               | (Guerra et al., 2016)                                                                                                                          |

**Table 5:** Scenario (forcing data) for models in BES-SIM.

| BES-SIM model                                     | Historical | Future Land-Use Change or Climate (2050)                        |                                                                              |                                                              |
|---------------------------------------------------|------------|-----------------------------------------------------------------|------------------------------------------------------------------------------|--------------------------------------------------------------|
|                                                   |            | Land use only, climate held constant at 2015 (SSP1, SSP3, SSP5) | Climate change only, land use held constant at 2015 (RCP2.6, RCP6.0, RCP8.5) | Land use and climate (SSP1xRCP2.6, SSP3xRCP6.0, SSP5xRCP8.5) |
| <b>Species-based models of biodiversity</b>       |            |                                                                 |                                                                              |                                                              |
| AIM-biodiversity                                  | *          | *                                                               | *                                                                            | *                                                            |
| InSiGHTS                                          | *          | *                                                               | *                                                                            | *                                                            |
| MOL                                               |            | *                                                               | *                                                                            | *                                                            |
| <b>Community-based models of biodiversity</b>     |            |                                                                 |                                                                              |                                                              |
| cSAR-iDiv                                         | *          | *                                                               |                                                                              |                                                              |
| cSAR-IIASA-ETH                                    | *          | *                                                               |                                                                              |                                                              |
| BILBI                                             | *          | *                                                               |                                                                              | *                                                            |
| PREDICTS                                          | *          | *                                                               |                                                                              |                                                              |
| GLOBIO - Aquatic                                  |            |                                                                 |                                                                              | *                                                            |
| GLOBIO - Terrestrial                              |            | *                                                               | *                                                                            | *                                                            |
| <b>Ecosystems-based model of biodiversity</b>     |            |                                                                 |                                                                              |                                                              |
| Madingley                                         | *          |                                                                 |                                                                              | *                                                            |
| <b>Models of ecosystem functions and services</b> |            |                                                                 |                                                                              |                                                              |
| LPJ-GUESS                                         | *          | *                                                               | *                                                                            | *                                                            |
| LPJ                                               | *          | *                                                               | *                                                                            | *                                                            |
| CABLE                                             | *          | *                                                               | *                                                                            | *                                                            |
| GLOBIO-ES                                         |            |                                                                 |                                                                              | *                                                            |
| InVEST                                            |            |                                                                 |                                                                              | *                                                            |
| GLOSP                                             |            |                                                                 |                                                                              | *                                                            |

**Table 6:** Selected output indicators for inter-comparison of biodiversity and ecosystems models.

| BES-SIM model                                 | Local scale species diversity at pixel level (P $\alpha$ and N $\alpha$ ) | Subregional and global scale species diversity (P $\gamma$ and N $\gamma$ ) | Species-based intactness and abundance (I $\alpha$ ) | Local and global habitat change (H $\alpha$ and H $\gamma$ ) |
|-----------------------------------------------|---------------------------------------------------------------------------|-----------------------------------------------------------------------------|------------------------------------------------------|--------------------------------------------------------------|
| <b>Species-based models of biodiversity</b>   |                                                                           |                                                                             |                                                      |                                                              |
| AIM-biodiversity                              | *                                                                         | *                                                                           |                                                      | *                                                            |
| InSiGHTS                                      | *                                                                         | *                                                                           |                                                      | *                                                            |
| MOL                                           | *                                                                         | *                                                                           |                                                      | *                                                            |
| <b>Community-based models of biodiversity</b> |                                                                           |                                                                             |                                                      |                                                              |
| cSAR-iDiv                                     | *                                                                         | *                                                                           |                                                      |                                                              |
| cSAR-IIASA-ETH                                | *                                                                         | *                                                                           |                                                      |                                                              |
| BILBI                                         |                                                                           | *                                                                           |                                                      |                                                              |
| PREDICTS                                      | *                                                                         |                                                                             | *                                                    |                                                              |
| GLOBIO - Aquatic                              |                                                                           |                                                                             | *                                                    |                                                              |
| GLOBIO - Terrestrial                          |                                                                           |                                                                             | *                                                    |                                                              |
| <b>Ecosystems-based model of biodiversity</b> |                                                                           |                                                                             |                                                      |                                                              |
| Madingley                                     |                                                                           |                                                                             | *                                                    |                                                              |

**Table 7:** Selected output indicators for inter-comparison of ecosystem functions and services models, categorized based on the classification of Nature's Contributions to People (Diaz et al., 2018).

| BES-SIM model | NCP 2. Pollination and dispersal of seeds and other propagules                  | NCP 4. Regulation of climate      | NCP 6. Regulation of freshwater quantity, location and timing | NCP 7. Regulation of freshwater and coastal water quality | NCP 8. Formation, protection and decontamination of soils and sediments               | NCP 9. Regulation of hazards and extreme events          | NCP 10. Regulation of detrimental organisms and biological processes                         | NCP 11. Energy            | NCP 12. Food and feed                                                                     | NCP 13. Materials, companionship and labor |
|---------------|---------------------------------------------------------------------------------|-----------------------------------|---------------------------------------------------------------|-----------------------------------------------------------|---------------------------------------------------------------------------------------|----------------------------------------------------------|----------------------------------------------------------------------------------------------|---------------------------|-------------------------------------------------------------------------------------------|--------------------------------------------|
| LPJ-GUESS     |                                                                                 | Total carbon<br>Vegetation carbon | Monthly runoff                                                | Nitrogen leaching                                         |                                                                                       |                                                          |                                                                                              | Bioenergy-crop production | Harvested carbon in croplands that are used for food production                           | Wood harvest (LUH2 extraction)             |
| LPJ           |                                                                                 | Total carbon<br>Vegetation carbon | Monthly runoff                                                |                                                           |                                                                                       |                                                          |                                                                                              |                           |                                                                                           |                                            |
| CABLE         |                                                                                 | Total carbon<br>Vegetation carbon | Monthly runoff,<br>Total runoff                               |                                                           |                                                                                       |                                                          |                                                                                              |                           | Above ground carbon removed from cropland and pastures as a result of harvest and grazing | Wood harvest                               |
| GLOBIO-ES     | Fraction of cropland potentially pollinated, relative to all available cropland | Total carbon                      | Water scarcity index                                          | Nitrogen in water<br>Phosphorus in water                  | Erosion protection: fraction with low risk relative to the area that needs protection | Flood risk: number of people exposed to river flood risk | Pest control: Fraction of cropland potentially protected, relative to all available cropland |                           | Total crop production<br>Total grass production                                           |                                            |
| InVEST        | Proportion of agricultural lands whose pollination needs are met                |                                   |                                                               | Nitrogen export<br>Nitrogen export*capita                 |                                                                                       | Coastal vulnerability<br>Coastal vulnerability*capita    |                                                                                              |                           | Caloric production per hectare on the current landscape for each crop type                |                                            |
| GLOSP         |                                                                                 |                                   |                                                               |                                                           | Soil protection                                                                       |                                                          |                                                                                              |                           |                                                                                           |                                            |

**Table 8.** Acronyms

|              |                                                                                  |
|--------------|----------------------------------------------------------------------------------|
| AIM          | Asia-pacific Integrated Model                                                    |
| BES-SIM      | Biodiversity and Ecosystem Services Scenario-based Intercomparison of Models     |
| BIOMOD       | BIOdiversity MODelling                                                           |
| BILBI        | Biogeographic modelling Infrastructure for Large-scale Biodiversity Indicators   |
| CABLE        | Community Atmosphere Biosphere Land Exchange                                     |
| CMIP         | Climate Model Inter-comparison Project                                           |
| cSAR         | Countryside Species Area Relationship                                            |
| DGVM         | Dynamic Global Vegetation Model                                                  |
| ESM          | Earth System Models                                                              |
| GBIF         | Global Biodiversity Information Facility                                         |
| GBO          | Global Biodiversity Outlooks                                                     |
| GCM          | Global Circulation Models                                                        |
| GEO          | Global Environmental Outlook                                                     |
| GLOBIO       | GLObal BIOdiversity                                                              |
| GLOSP        | GLObal Soil Protection                                                           |
| IAM          | Integrated Assessment Models                                                     |
| IMAGE        | Integrated Model to Assess the Global Environment                                |
| InVEST       | Integrated Valuation of Ecosystem Services and Tradeoffs                         |
| IPBES        | Intergovernmental Science-Policy Platform on Biodiversity and Ecosystem Services |
| IPCC         | Intergovernmental Panel on Climate Change                                        |
| IPSL-CM5A-LR | Institut Pierre-Simon Laplace-Climate Model 5A-Low Resolution                    |
| ISI-MIP      | Inter-Sectoral Impact Model Intercomparison Project                              |
| LPJ          | Lund-Potsdam-Jena                                                                |
| LPJ-GUESS    | Lund-Potsdam-Jena General Ecosystem Simulator                                    |
| LUH2         | Land Use Harmonization Project version 2                                         |
| MA           | Millennium Ecosystem Assessment                                                  |
| MAgPIE       | The Model of Agricultural Production and its Impact on the Environment           |
| MIP          | Model Intercomparison Project                                                    |
| MOL          | Map of Life                                                                      |
| NCP          | Nature's Contributions to People                                                 |
| PREDICTS     | Projecting Responses of Ecological Diversity In Changing Terrestrial Systems     |
| RCM          | Regional Climate Models                                                          |
| RCPs         | Representative Concentration Pathways                                            |
| SAR          | Species Area Relationship                                                        |
| SR           | Species Richness                                                                 |
| SSPs         | Shared Socio-economic Pathways                                                   |
